1 RIPK3 promotes brain region-specific interferon signaling and restriction of tick-borne flavivirus  
2 infection

3  
4 Marissa Lindman<sup>a</sup>, Juan P Angel<sup>a</sup>, Irving Estevez<sup>a</sup>, Nydia P Chang<sup>a</sup>, Tsui-Wen Chou<sup>a</sup>, Micheal  
5 McCourt<sup>a</sup>, Colm Atkins<sup>a</sup>, and Brian P. Daniels<sup>a#</sup>

6  
7 <sup>a</sup>Department of Cell Biology and Neuroscience, Rutgers University, Piscataway, NJ, USA

8  
9 #Correspondence:

10 Brian Daniels  
11 604 Allison Road  
12 Room B314  
13 Piscataway, NJ 08854  
14 (848) 445-2709  
15 [b.daniels@rutgers.edu](mailto:b.daniels@rutgers.edu)

16  
17  
18

19 **Abstract**

20

21

22

23

24

25

26

27

28

29

30

31

32

33

34

35

36

37

38

39

40

41

42

**Importance**

43

44

45

46

47

48

49

50

51

52

53

54

55

Innate immune signaling in the central nervous system (CNS) exhibits many remarkable specializations that vary across cell types and CNS regions. In the setting of neuroinvasive flavivirus infection, neurons employ the immunologic kinase receptor-interacting kinase 3 (RIPK3) to promote an antiviral transcriptional program, independently of the traditional function of this enzyme in promoting necroptotic cell death. However, while recent work has established roles for neuronal RIPK3 signaling in controlling mosquito-borne flavivirus infections, including West Nile virus and Zika virus, functions for RIPK3 signaling in the CNS during tick-borne flavivirus infection have not yet been explored. Here, we use a model of Langkat virus (LGTV) encephalitis to show that RIPK3 signaling is specifically required in neurons of the cerebellum to control LGTV replication and restrict disease pathogenesis. This effect did not require the necroptotic executioner molecule mixed lineage kinase domain like protein (MLKL), a finding similar to previous observations in models of mosquito-borne flavivirus infection. However, control of LGTV infection required a unique, region-specific dependence on RIPK3 to promote expression of key antiviral interferon-stimulated genes (ISG) in the cerebellum. This RIPK3-mediated potentiation of ISG expression was associated with robust cell-intrinsic restriction of LGTV replication in cerebellar granule cell neurons. These findings further illuminate the complex roles of RIPK3 signaling in the coordination of neuroimmune responses to viral infection, as well as provide new insight into the mechanisms of region-specific innate immune signaling in the CNS.

Interactions between the nervous and immune systems are very carefully orchestrated in order to protect the brain and spinal cord from immune-mediated damage, while still maintaining protective defenses against infection. These specialized neuro-immune interactions have been shown to vary significantly across regions of the brain, with innate antiviral signaling being particularly strong in the cerebellum, although the reasons for this are poorly understood. Here, we show a specialized adaptation of programmed cell death signaling that uniquely protects the cerebellum from tick-borne flavivirus infection. These findings provide important new insight into the molecular mechanisms that promote the uniquely robust antiviral immunity of the cerebellum. They also provide new clues into the pathogenesis of tick-borne encephalitis, a zoonosis of significant global concern.

## 56 Introduction

57

58 Flaviviruses are a family of positive sense RNA viruses which include several notable  
59 pathogens associated with neuroinvasive infection in humans, including West Nile virus (WNV),  
60 Zika virus (ZIKV), and Japanese Encephalitis virus (1). While nearly all major flaviviruses are  
61 transmitted by mosquito vectors, a small but significant number of flaviviruses are transmitted by  
62 ticks, including Tick-borne encephalitis virus (TBEV) and its close relatives that together make  
63 up a single TBEV serocomplex. Tick borne encephalitis is a significant and growing threat to  
64 public health, particularly in Europe and northern Asia, where TBEV constitutes the most  
65 prevalent tick-borne zoonotic disease (2-4). Notably, some TBEV strains elicit mortality rates up  
66 to 40% in humans (5), underscoring the urgent need to better understand the mechanisms  
67 underlying the pathogenesis of tick-borne flavivirus infections.

68

69 Effective control of flavivirus infection in the central nervous system (CNS) requires  
70 robust innate immune signaling in neural cells, particularly neurons, which are the predominantly  
71 infected cell type in most cases of flavivirus encephalitis (6-9). Effective type I interferon (IFN)  
72 signaling is of particular importance for innate control of viral replication in neurons (10-12).  
73 Notably, differences in type I IFN signaling across neural cell types and brain regions are  
74 associated with differential susceptibility to flavivirus infection. For example, previous reports  
75 suggest that the enhanced type I IFN signaling observed in hindbrain regions compared to the  
76 forebrain is an underlying determinant of the enhanced susceptibility of forebrain regions to  
77 WNV infection (12, 13). However, the unique signaling mechanisms that promote differential  
78 IFN-mediated control of viral infection in the hindbrain have not been extensively characterized.

79

80 A potential regulator of neuronal IFN signaling during flavivirus infection is receptor  
81 interacting protein kinase-3 (RIPK3). RIPK3 is an enzyme traditionally associated with  
82 necroptosis, a form of lytic programmed cell death (14). Necroptosis occurs via the RIPK3-  
83 dependent activation of mixed lineage kinase domain like protein (MLKL), which forms  
84 oligomeric pore complexes that induce cellular lysis (15). However, many recent studies have  
85 identified complex roles for RIPK3 signaling in the coordination of inflammation, including the  
86 regulation of inflammatory transcriptional responses that occur independently of necroptosis  
87 (16-24). We and others have demonstrated that RIPK3 signaling in neurons is of particular  
88 importance for the control of neurotropic viral infections, as neuronal RIPK3 promotes a robust  
89 antimicrobial transcriptional program, including many IFN stimulated genes (ISGs), that restricts  
90 viral infection without inducing neuronal necroptosis (16, 17). Other recent studies have  
91 identified unexpected roles for RIPK3 in the regulation of type I IFN signaling, via mechanisms  
92 which include the regulation of pattern recognition receptor signaling and protein kinase-R  
93 (PKR)-mediated stabilization of *Irfn* mRNA (18, 19).

94

95 In this study, we interrogated roles for RIPK3 in controlling tick-borne flavivirus infection.  
96 To do so, we used Langat virus (LGTV), a naturally attenuated member of the TBEV  
97 serocomplex that can be studied under BSL2 containment. *Ripk3*<sup>-/-</sup> mice exhibited enhanced  
98 clinical disease following subcutaneous LGTV infection, while *Mlkl*<sup>-/-</sup> mice were indistinguishable  
99 from littermate controls, suggesting a necroptosis-independent function for RIPK3 in restricting  
100 LGTV pathogenesis. Notably, *Ripk3*<sup>-/-</sup> mice exhibited increased viral burden in the cerebellum,  
101 along with diminished expression of inflammatory chemokines and ISGs in the cerebellum, but  
102 not the cerebral cortex. *In vitro* analysis of cultured primary cortical and cerebellar cell types  
103 showed that pharmacologic inhibition of RIPK3 resulted in enhanced LGTV replication in  
104 cerebellar granule cell neurons but not in cortical neurons or in astrocytes derived from either  
105 brain region. Transcriptional profiling showed that RIPK3 signaling was uniquely required for the

106 full induction of ISG expression in cerebellar granule cell neurons, demonstrating a previously  
107 unknown, region-specific function for RIPK3 in coordinating innate antiviral immunity within the  
108 CNS.

## 111 Results

### 113 RIPK3 controls LGTV pathogenesis independently of MLKL and peripheral immunity

114  
115 To assess the role of RIPK3 in controlling LGTV pathogenesis, we subcutaneously  
116 infected *Ripk3*<sup>-/-</sup> mice, along with heterozygous littermate controls, with 3x10<sup>4</sup> plaque forming  
117 units (pfu) of the Malaysian LGTV strain TP21. We note that *Ripk3*<sup>+/-</sup> animals do not exhibit  
118 haploinsufficiency and are routinely used as littermate controls in studies of this pathway (25-  
119 27). Control animals exhibited limited mortality following LGTV infection (Figure 1A), consistent  
120 with previous reports (28, 29). However, mice lacking *Ripk3* expression exhibited a significantly  
121 accelerated and enhanced rate of mortality (Figure 1A). In addition, a higher proportion of *Ripk3*<sup>-/-</sup>  
122 mice exhibited clinical signs of neurologic disease, including paresis or full hindlimb paralysis,  
123 by 14 days post infection (dpi) (Figure 1B), and this difference persisted to at least 21 dpi. These  
124 data suggest that *Ripk3* is essential for restricting neuropathogenesis during LGTV infection.

125  
126 To better understand this phenotype, we first assessed whether RIPK3 was required for  
127 early control of systemic infection. Spleens of infected mice exhibited low levels of LGTV RNA  
128 that were not impacted by *Ripk3* expression (Figure 1C). To test whether *Ripk3*<sup>-/-</sup> mice exhibited  
129 any deficiencies in peripheral immune responses, we performed flow cytometric analysis of  
130 major immune cell subsets in the spleens of infected animals at 8 dpi. *Ripk3*<sup>-/-</sup> animals exhibited  
131 similar frequencies (Figure 1D) and total numbers (Figure 1E-F) of CD4 and CD8 T cells among  
132 all splenocytes compared to littermate controls, as well as similar rates of CD44 expression (a  
133 key T cell activation marker) across both subsets (Figure 1G-H). Numbers of B cells (Figure 1I)  
134 and natural killer (NK) cells (Figure 1J) were also similar between genotypes. In the myeloid  
135 compartment, we observed similar numbers of CD11c<sup>+</sup> MHCII<sup>+</sup> dendritic cells (Figure 1K)  
136 between genotypes, as well as similar numbers of myeloid subsets expressing F4/80 (Figure  
137 1L), Ly6G (Figure 1M), and Ly6C (Figure 1N). Both CD11c<sup>+</sup> MHCII<sup>+</sup> and F4/80<sup>+</sup> antigen  
138 presenting cell subsets also exhibited similar rates of expression of the costimulation signal  
139 CD80 between genotypes (Figure 1O-P). These data suggest that *Ripk3*<sup>-/-</sup> mice mounted normal  
140 peripheral immune responses to subcutaneous LGTV challenge, similar to our previous  
141 observations with WNV and ZIKV (16, 17). Thus, the increased pathogenesis observed in mice  
142 lacking *Ripk3* was unlikely to arise from a failure in peripheral virologic control.

143  
144 A potential mechanism by which RIPK3 signaling might restrict LGTV pathogenesis is  
145 through the induction of necroptosis in infected cells. We thus tested whether loss of the  
146 necroptotic executioner molecule MLKL would impact disease course following subcutaneous  
147 LGTV infection. Notably, *Mlkl*<sup>-/-</sup> mice exhibited no difference in either survival or development of  
148 clinical disease signs compared to littermate controls (Figure 2A-B). We saw similarly that *Mlkl*<sup>-/-</sup>  
149 did not exhibit altered splenic viral burden at 8dpi (Figure 2C). Flow cytometric analysis also  
150 revealed essentially identical numbers and frequencies of all major immune cell subsets in the  
151 spleen at this time point (Figure 2C-P). Multistep growth curve analysis also demonstrated that  
152 neither RIPK3 nor MLKL impacted the low levels of LGTV replication observed in primary  
153 leukocyte cultures, including bone marrow derived macrophages and dendritic cells  
154 (Supplemental Figure 1A-B). These data suggest that MLKL, and therefore necroptosis, is not a  
155 major contributor to peripheral virologic control or overall disease pathogenesis in the setting of

156 LGTV infection, and thus that RIPK3 exerts its protective effect in this model through an  
157 alternative mechanism.

### 158 159 **RIPK3 is required for CNS-intrinsic restriction of LGTV infection**

160  
161 Because we did not observe differences in peripheral virologic control in *Ripk3*<sup>-/-</sup> mice, we  
162 next questioned whether RIPK3 acted in a CNS-intrinsic manner to limit LGTV infection. To  
163 assess this, we next used an intracranial infection route in order to assess local effects of RIPK3  
164 signaling on LGTV pathogenesis. *Ripk3*<sup>-/-</sup> mice exhibited accelerated and enhanced mortality  
165 compared to littermate controls following intracranial infection (Figure 3A). *Ripk3*-deficient mice  
166 also exhibited worsened clinical disease prior to death, as evidenced by earlier and more  
167 dramatic weight loss following infection (Figure 3B). In contrast, *Mlkl*<sup>-/-</sup> mice were  
168 indistinguishable from littermate controls in terms of overall mortality (Figure 3C) and weight loss  
169 (Figure 3D) following intracranial infection. These data further supported the idea that RIPK3  
170 restricts LGTV neuropathogenesis via CNS-intrinsic mechanisms, independently of necroptosis.

### 171 172 **RIPK3 promotes neuronal chemokine expression in a region-specific manner following** 173 **LGTV infection**

174  
175 We and other previously showed that neuronal RIPK3 signaling was required for the  
176 expression of key inflammatory chemokines that served to restrict WNV pathogenesis by  
177 coordinating the recruitment of leukocytes into the infected CNS. We thus questioned whether  
178 RIPK3 also promotes chemokine expression in the CNS during LGTV infection. Surprisingly,  
179 transcriptional profiling in the cerebral cortex of *Ripk3*<sup>-/-</sup> mice following subcutaneous LGTV  
180 infection revealed no differences in expression of major chemokines compared to littermate  
181 controls (Figure 4A). However, we did observe significantly diminished chemokine responses in  
182 cerebellar tissues derived from *Ripk3*<sup>-/-</sup> animals (Figure 4B). To understand which cell types  
183 were driving this region-specific deficit in chemokine expression, we next cultured primary  
184 neurons and astrocytes derived specifically from either cerebral cortex or cerebellum and  
185 infected with LGTV, with or without a small molecule inhibitor of RIPK3 (GSK 872). Consistent  
186 with our *in vivo* findings, blockade of RIPK3 in cerebral cortical neurons did not impact  
187 chemokine expression following LGTV infection (Figure 4C). In contrast, infected cerebellar  
188 granule cell neuron cultures exhibited significantly diminished chemokine expression when  
189 RIPK3 was inhibited by GSK 872 (Figure 4D). Notably, we did not observe a dependence on  
190 RIPK3 for the expression of chemokines in astrocytes derived from either region (Figure 4E-F).  
191 These data suggest that RIPK3 serves an unexpected, region-specific transcriptional function in  
192 neurons of the cerebellum during neuroinvasive LGTV infection.

### 193 194 **RIPK3 is not required for immune cell recruitment to the LGTV-infected CNS**

195  
196 We next questioned whether diminished chemokine expression in the cerebellum of  
197 *Ripk3*<sup>-/-</sup> mice would result in a failure to recruit antiviral leukocytes into this brain region. We thus  
198 performed flow cytometric analysis of leukocytes derived from either cerebral cortex or  
199 cerebellum following subcutaneous LGTV infection. Remarkably, we saw no evidence of  
200 changes in lymphocyte recruitment in either brain region of *Ripk3*<sup>-/-</sup> mice compared to littermate  
201 controls on either 6 or 8 dpi (Figure 5A). This lack of difference extended across all major  
202 CD45<sup>hi</sup> infiltrating leukocyte subsets, including CD4<sup>+</sup> and CD8<sup>+</sup> T cells (Figure 5B-C), NK cells  
203 (Figure 5D), CD11c<sup>+</sup> MHCII<sup>+</sup> dendritic cells (Figure 5E) and myeloid subsets expressing F4/80  
204 (Figure 5F), Ly6G (Figure 5G), and Ly6C (Figure 5H). We similarly did not observe differences  
205 in numbers of CD45<sup>lo</sup> microglia (Figure 5I), suggesting no major differences in microglia

206 proliferation between genotypes in either region. These data suggested that, despite significant  
207 differences in the expression of major leukocyte chemoattractants in the cerebellum, differences  
208 in immune cell recruitment did not account for the increased pathogenesis observed in *Ripk3*<sup>-/-</sup>  
209 mice during LGTV infection.

### 211 **RIPK3 promotes cell-intrinsic restriction of LGTV replication in cerebellar neurons**

212  
213 Given these observations, we next questioned whether *Ripk3*<sup>-/-</sup> mice fail to control LGTV  
214 infection due to impaired innate immune restriction of LGTV replication. Assessment of viral  
215 burdens in brains of *Ripk3*<sup>-/-</sup> mice following subcutaneous LGTV infection revealed that *Ripk3*<sup>-/-</sup>  
216 mice exhibited significantly elevated CNS viral titers, particularly in the cerebellum, at both 8 and  
217 12 dpi (Figure 6A). In contrast, *Mlkl*<sup>-/-</sup> exhibited no such difference in viral burden in either brain  
218 region (Figure 6B). Differences in viral burden did not appear to be linked to deficits in blood-  
219 brain barrier integrity, as both *Ripk3*<sup>-/-</sup> mice and littermate controls exhibited similar levels of  
220 sodium fluorescein extravasation into the CNS following infection (Figure 6C). We thus  
221 questioned whether RIPK3 was required for cell-intrinsic restriction of viral replication in  
222 susceptible CNS cell types. Multistep growth curve analysis in primary CNS cells revealed that  
223 pharmacologic inhibition of RIPK3 had no effect on LGTV replication in neurons derived from  
224 cerebral cortex (Figure 6D). In contrast, inhibition of RIPK3 significantly enhanced LGTV  
225 replication in primary cerebellar granule cell neurons cultures (Figure 6E). This effect was  
226 unique to neurons, as GSK 872 treatment had no impact on LGTV replication in primary  
227 astrocytes derived from either brain region (Figure 6F-G). Together, these data suggested that  
228 the enhanced pathogenesis observed in *Ripk3*<sup>-/-</sup> mice was due to a specific failure to control  
229 infection in neurons of the cerebellum, resulting in enhanced overall CNS viral burden.

### 231 **RIPK3 potentiates Type I IFN signaling in cerebellar neurons during LGTV infection**

232  
233 Our previous observation of diminished chemokine expression in cerebellar neurons  
234 derived from *Ripk3*<sup>-/-</sup> mice suggested that these cells may exhibit broader deficits in innate  
235 immune signaling, resulting in poor control of LGTV replication. We, therefore, next questioned  
236 whether IFN signaling was perturbed in the cerebellum of mice lacking RIPK3 expression.  
237 Transcriptional profiling in brain tissues following subcutaneous LGTV infection revealed that,  
238 indeed, the cerebella of *Ripk3*<sup>-/-</sup> mice exhibited diminished expression of many ISGs known to  
239 be critical for control of flavivirus replication (30-35), including *Ifit1*, *Isg15*, *Mx1*, *Mx2*, *Oas1b*, and  
240 *Rsad2*, while this phenotype was not observed in the cerebral cortex (Figure 7A-B). Similar  
241 analyses in primary cell cultures confirmed that cerebellar granule cell neurons, but not neurons  
242 derived from cerebral cortex, exhibited diminished expression of ISGs when RIPK3 signaling  
243 was blocked via GSK 872 treatment (Figure 7C-D). In contrast, we observed little to no impact  
244 of RIPK3 blockade on ISG expression in astrocytes derived from either brain region (Figure 7E-  
245 F). Together, these data demonstrate that RIPK3 signaling is required for the robust induction of  
246 type I IFN responses in neurons of the cerebellum, which is required for cell-intrinsic restriction  
247 of LGTV replication.

248  
249 To better understand the role of RIPK3 signaling in potentiating ISG expression, we next  
250 questioned whether RIPK3 acts downstream of IFN receptor signaling. To assess this, we  
251 treated neuron cultures with exogenous IFN $\beta$  for 1 hour following pretreatment with GSK 872 or  
252 vehicle control. As expected, IFN $\beta$  treatment resulted in robust induction of multiple ISGs  
253 (Figure 8A, Supplemental Figure 2A). However, pharmacologic blockade of RIPK3 did not  
254 impact ISG expression induced by IFN $\beta$  treatment in either cerebellar granule cell neurons  
255 (Figure 8A) or in cerebral cortical neurons (Supplemental Figure 2A), suggesting that RIPK3

likely does not act directly downstream of the type I IFN receptor (IFNAR) to modulate gene expression and/or that type I IFN alone is not sufficient to induce RIPK3 activation. We next tested the alternative hypothesis that RIPK3 regulates IFN signaling during LGTV infection by directly influencing the expression of IFN ligands and receptors. Surprisingly, transcriptional analysis revealed that pharmacologic blockade of RIPK3 did not influence the expression of the type I IFN ligands *Ifna* and *Ifnb* in cerebellar granule cell neurons following infection (Figure 8B). In contrast, GSK 843 treatment significantly blunted infection-induced upregulation of IFN receptor subunits, including the type I IFN receptor subunits *Ifnar1* and *Ifnar2*, and the type II IFN receptor subunits *Ifngr1*, and *Ifngr2*. Other IFN ligands and receptors, including *Ifng* and the type III IFN ligands *Ifnl2* and *Ifnl3* were undetectable in all conditions (data not shown). Importantly, we did not observe this RIPK3-dependency in IFN receptor expression in cerebral cortical neuron cultures (Supplemental Figure 2B), suggesting that RIPK3 functions uniquely in cerebellar granule cell neurons to enhance type I IFN signaling during LGTV infection.

To further investigate a role for RIPK3 in IFN-mediated gene expression in cerebellar neurons, we next performed experiments in which we blocked RIPK3 activity with or without simultaneous blockade of type I IFN signaling using a neutralizing antibody against IFNAR1. We reasoned that this paradigm would allow us to assess the differential influence of RIPK3 on IFNAR-dependent and IFNAR-independent gene expression following LGTV infection. Perhaps unsurprisingly, we observed that expression of most ISGs was completely dependent on IFNAR1 signaling, making it difficult to distinguish a specific role for RIPK3 in the absence of intact type I IFN signaling (Supplemental Figure 2C). We thus identified several alternative inflammatory genes whose expression was either completely (*Cxcl1*) or partially (*Ccl2* and *Il6*) independent of IFNAR1 signaling following infection. Notably, pharmacologic blockade of RIPK3 only impacted the IFNAR1-dependent portion of the induced expression of these genes, while having no effect on the IFNAR1-independent portion, as indicated by a lack of effect in  $\alpha$ IFNAR1-treated cultures (Figure 8C). Together, these data further support our observation of synergistic signaling between type I IFN and RIPK3 signaling in cerebellar granule cell neurons during LGTV infection.

## Discussion

Our findings identify a previously unknown function for RIPK3 in the coordination of brain region-specific innate immunity. The study of regional differences in neuroimmune signaling is a growing field, and there is accumulating evidence to suggest that resident neural cells exhibit differential responses to viral infection and cytokine stimulation across distinct anatomical regions of the CNS (36-39). Neurons and astrocytes in the cerebellum, in particular, have been shown to exhibit higher responsiveness to stimulation by type-I IFN, as well as to express higher basal levels of pathogen sensor molecules compared to other brain regions, suggesting a key evolutionary importance of innate antiviral defense in this tissue (12, 13). This regional difference in type I IFN signaling appears to underlie, at least in part, the relatively lower susceptibility of the cerebellum to flavivirus infection compared to susceptible regions of the forebrain, such as the cerebral cortex and hippocampus. However, the molecular mechanisms that determine the enhanced innate immune signaling observed in the cerebellum remain poorly understood. Our study suggests that RIPK3 signaling is required for the robust induction of ISG expression in cerebellar neurons during LGTV infection, although ongoing work is needed to understand the specific signaling interactions that mediate this effect.

Previous studies have described a highly complex interplay between RIPK3 and type I IFN signaling that varies significantly by cell type and disease model (17-19, 40). It is relatively

306 clear that type I IFN signaling is capable of activating RIPK3 through various mechanisms,  
307 resulting in necroptosis and/or necroptosis-independent transcriptional activation (40-43).  
308 However, how RIPK3 operates *upstream* of (or synergistically with) type I IFN signaling to  
309 influence expression of ISGs is less clear. We and others have shown that ISG expression is  
310 significantly diminished in a variety of settings when RIPK3 signaling is ablated (17, 18),  
311 including in cerebellar granule cell neurons during LGTV infection in this study. One possible  
312 explanation for this effect is RIPK3-mediated activation of NF- $\kappa$ B, a transcription factor strongly  
313 associated with RIPK signaling with known roles in potentiating type I IFN signaling and ISG  
314 expression (22, 44-46). We and others also previously showed that RIPK3 activation in cortical  
315 neurons following ZIKV infection leads to interferon regulatory factor 1 (IRF1) activation, which  
316 was required for expression of at least a subset of RIPK3-induced genes in that setting,  
317 although this effect is likely indirect, as IRF1 is not a known RIPK3 substrate (17). Additional  
318 work will be needed to fully characterize the regulatory mechanisms that are invoked in the  
319 interplay between RIPK3 and type I IFN signaling in the CNS.

320  
321 Our study also further expands our understanding of the necroptosis-independent  
322 functions for RIPK3 signaling in the CNS. Many studies have now firmly established the  
323 importance of RIPK3 in promoting host defense through mechanisms independent of its  
324 canonical role in necroptosis (16-21). However, these necroptosis-independent functions appear  
325 to vary significantly by disease state, including CNS infection with distinct neuroinvasive  
326 flaviviruses (47, 48). We and others previously showed that the primary role for RIPK3 in  
327 restricting WNV encephalitis was the induction of chemokine expression and the recruitment of  
328 antiviral leukocytes into the infected CNS (16). Notably, while we did observe RIPK3-mediated  
329 chemokine expression in the cerebellum during LGTV infection, this chemokine expression was  
330 apparently dispensable for CNS immune cell recruitment. Instead, the transcriptional activation  
331 of antiviral effector genes, including ISGs, was required for cell-intrinsic restriction of LGTV  
332 replication in neurons, a phenotype more similar to our findings with ZIKV (17), although we did  
333 not observe evidence for a regional specification of this response during ZIKV infection. In  
334 contrast to these observations, Bian and colleagues have observed quite distinct phenotypes in  
335 a model of JEV encephalitis, wherein both RIPK3 and MLKL appeared to exacerbate rather than  
336 restrict disease pathogenesis (49, 50). RIPK3 also appeared to *suppress* rather than promote  
337 ISG expression in JEV infected neurons. The factors that determine such distinct outcomes of  
338 RIPK3 signaling across this family of closely related viruses are mysterious and are the subject  
339 of ongoing investigation by our laboratory and others.

340  
341



## 342 **Materials and Methods**

343

### 344 **Mouse lines**

345 *Ripk3*<sup>-/-</sup> (51) *Mlkl*<sup>-/-</sup> (52) mouse lines were bred and housed under specific-pathogen free  
346 conditions in Nelson Biological Laboratories at Rutgers University. *Ripk3*<sup>-/-</sup> mice were generously  
347 provided by Genentech, Inc. Wild-type C57BL/6J mice were either obtained commercially  
348 (Jackson Laboratories) or bred in-house. Mice used for subcutaneous infections were 5 weeks  
349 old; mice used for intracranial infections were 8-15 weeks old.

350

### 351 **Virus and titer determination**

352 Langat virus strain TP21 was used throughout the study. Founder stocks were obtained  
353 from the World Reference Center for Emerging Viruses and Arboviruses (WRCEVA). Laboratory  
354 stocks were generated using Vero E6 cells (ATCC, #CRL-1586) and frozen at -80°C until  
355 needed. Virus titers were determined by plaque assay on Vero E6 cells. Cells were maintained  
356 in DMEM (Corning #10-013-CV) supplemented with 10% Heat Inactivated FBS (Gemini  
357 Biosciences #100-106), 1% Penicillin–Streptomycin–Glutamine (Gemini Biosciences #400-110),  
358 1% Amphotericin B (Gemini Biosciences #400-104), 1% Non-Essential Amino Acids (Cytiva,  
359 #SH30238.01), and 1% HEPES (Cytiva, #SH30237.01). Plaque assay media was composed of  
360 1X EMEM (Lonza # 12-684F) supplemented with 2% Heat Inactivated FBS (Gemini Biosciences  
361 #100-106), 1% Penicillin–Streptomycin–Glutamine (Gemini Biosciences, #400-110), 1%  
362 Amphotericin B (Gemini Biosciences #400-104), 1% Non-Essential Amino Acids (Cytiva,  
363 #SH30238.01), and 1% HEPES (Cytiva, SH30237.01), 0.75% Sodium Bicarbonate (VWR,  
364 #BDH9280) and 0.5% Methyl Cellulose (VWR, #K390). Plaque assays were developed at 5dpi  
365 by removal of overlay media and staining/fixation using 10% neutral buffered formalin (VWR,  
366 #89370) and 0.25% crystal violet (VWR, #0528). Plaque assays were performed by adding  
367 100uL of serially diluted sample for 1 hour at 37°C to 12-well plates containing 200,000 Vero E6  
368 cells per well. Plates were further incubated with plaque assay media at 37°C and 5% CO<sub>2</sub> for 5  
369 days. Medium was removed from the wells and replaced with fixative containing crystal violet for  
370 approximately 20-30 minutes. Plates were washed repeatedly in H<sub>2</sub>O and allowed to dry before  
371 counting visible plaques.

372

### 373 **Mouse infections and tissue harvesting**

374 Isoflurane anesthesia was used for all procedures. Mice were inoculated subcutaneously  
375 (50uL) with 3x10<sup>4</sup> PFU or injected intracranially (10uL) with 50 PFU of LGTV-TP21 using insulin  
376 syringes (BD Medical, #BD-329461). At appropriate times post infection, mice underwent  
377 cardiac perfusions with 30 mL cold sterile 1X phosphate-buffered saline (PBS). Extracted  
378 tissues were weighed and homogenized using 1.0 mm diameter zirconia/silica beads (Biospec  
379 Products, #11079110z) in sterile PBS for plaque assay or TRI Reagent (Zymo, #R2050-1) for  
380 gene expression analysis. Homogenization was performed in an Omni Beadrupter Elite for 2  
381 sequential cycles of 20 s at a speed of 4 m/s.

382

### 383 **Primary cell infections**

384 Cortical and cerebellar astrocytes were harvested from P1-P2 pups and cortical neurons  
385 were harvested at E13.5-E15.5. Tissues were dissociated using the Neural Dissociation Kit (T)  
386 following manufacturer's instructions (Miltenyi, #130-093-231). Astrocytes were expanded in  
387 AM-a medium (ScienCell, #1831) supplemented with 10% FBS in fibronectin-coated cell culture  
388 flasks and seeded into plates coated with 20 µg/mL Poly-L-Lysine (Sigma-Aldrich, #9155)  
389 before experiments. Neurons were seeded into PLL-coated cell culture treated plates and grown  
390 in Neurobasal Plus + B-27 supplement medium (Thermo-Fisher Scientific, #A3582901) prior to  
391 use in experiments 7-9 days in vitro (DIV). Mouse cerebellar granule cells from C57BL/6 mice

392 (ScienCell, # M1530-57) were seeded into cell culture treated plates coated with 10 ug/mL Poly-  
393 D-Lysine (ThermoFisher, #A3890401) containing prewarmed Neuronal Medium (ScienCell,  
394 #1521) following manufacturer recommendations and used for experiments 6 DIV.

395  
396 Macrophages and dendritic cells were isolated from bone marrow of euthanized mice.  
397 Femurs were isolated and bone marrow pushed out using a sterile needle and syringe loaded  
398 with RPMI supplemented with 10% FBS, 1% Penicillin–Streptomycin–Glutamine, 1% HEPES,  
399 1% Glutamax (ThermoFisher, #35050061). Bone marrow was plated into non-cell-culture  
400 treated 10cm petri dishes in 8mL supplemented RPMI medium containing either 20ng/mL  
401 recombinant M-CSF (Peprotech, #315-02) or 20ng/mL recombinant GM-CSF (Peprotech, #315-  
402 03) and 20ng/mL IL-4 (Peprotech, #214-14) for differentiation into macrophages or dendritic  
403 cells, respectively. Cells were fed with additional medium containing the appropriate cytokines  
404 four days later and used for experiments at 6-7 DIV. Cells were seeded into cell-culture treated  
405 dishes prior to experimentation. For viral replication determination, all cultures were infected  
406 with LGTV TP21 at an MOI of 0.01. For qRT-PCR experiments, cortical and cerebellar neuron  
407 cultures were infected at an MOI of 0.5, while astrocyte cultures were infected using an MOI of  
408 0.01. The pharmacologic inhibitor of RIPK3, GSK872, was added to cultures at 100nM for 2  
409 hours prior to infection or subsequent treatments. Interferon- $\beta$  was added to neuron cultures at  
410 10ng/mL for 1 hour prior to harvesting cell lysates. IFNAR-1 monoclonal antibody (MAR1-5A3,  
411 Leinco Technologies) or isotype control (GIR-208, Leinco Technologies) were added to cultures  
412 at 5 $\mu$ g/mL 45 minutes prior to Langat virus infection.

#### 413 414 **Quantitative real-time PCR**

415 Total RNA from harvested tissues was extracted using Zymo Direct-zol RNA Miniprep kit,  
416 as per manufacturer instructions (Zymo, #R2051). Total RNA extraction from cultured cells,  
417 cDNA synthesis, and subsequent qRT-PCR were performed as previously described (22, 53).  
418 Cycle threshold (CT) values for analyzed genes were normalized to CT values of the  
419 housekeeping gene 18 S ( $CT_{\text{Target}} - CT_{18S} = \Delta CT$ ). Data from primary cell culture experiments  
420 were further normalized to baseline control values ( $\Delta CT_{\text{experimental}} - \Delta CT_{\text{control}} = \Delta\Delta CT$  (DDCT)). A  
421 list of primers used in this study can be found in **Supplemental Table 1**.

#### 422 423 **Flow Cytometry**

424 The cerebella and cerebral cortices of mouse brains were dissected from freshly  
425 perfused mice and placed into tubes containing 1X PBS. Brain tissues were incubated with  
426 10mL buffer containing 0.05% Collagenase Type I (Sigma-Aldrich, #C0130), 10ug/mL DNase I  
427 (Sigma-Aldrich, #D4527) and 10mM HEPES (Cytiva, #SH30237.01) in 1X Hanks' Balanced Salt  
428 Solution (VWR, #02-1231-0500) for one hour at room temperature under constant rotation.  
429 Brain tissues were transferred to a 70um strainer on 50mL conical tubes and mashed through  
430 the strainer using the plunger of 3-5mL syringes. Tissue was separated in 8 mL 37% Isotonic  
431 Percoll (Percoll: Cytiva, #17-0891-02; RPMI 1640: Corning, #10-040-CV, supplemented with 5%  
432 FBS) by centrifugation at 1200xg for 30 minutes with a slow break. The myelin layer and  
433 supernatant were discarded. Leukocytes were incubated in 1X RBC Lysis Buffer (Tonbo  
434 Biosciences, #TNB-4300-L100) for 10 minutes at room temperature. Cells were centrifuged and  
435 resuspended in FACS buffer composed of 1X PBS, 2% sodium azide and 5% FBS. Samples  
436 were transferred into a U-bottomed 96-well plate. Leukocytes were blocked with 2% normal  
437 mouse serum and 1% FcX Block (BioLegend, #101320) in FACS buffer for 30 minutes at 4°C  
438 prior to being stained with fluorescently conjugated antibodies to CD3e (Biolegend, clone 17A2),  
439 CD44 (Biolegend, clone IM7), CD19 (Biolegend, clone 6D5), CD8a (Biolegend, clone 53-6.7),  
440 CD4 (Biolegend, clone RM4-5), CD45.2 (Biolegend, clone 104), MHC-II (Biolegend, clone  
441 M5/114.15.2), NK1.1 (Biolegend, clone PK136), CD11c (Biolegend, clone N418), F4/80

442 (Biolegend, clone BM8), CD11b (Biolegend, clone M1/70), Ly6G (Biolegend, clone 1A8), Ly6C  
443 (Biolegend, clone HK1.4), CD80 (Biolegend, clone 16-10A1), and Zombie NIR (Biolegend,  
444 #423105). Leukocytes were stained for 30 minutes at 4°C prior to washing in FACS buffer and  
445 fixation with 1% PFA in PBS (ThermoFisher, #J19943-K2). Data collection and analysis were  
446 performed using a Cytex Northern Lights Cytometer (Cytex, Fremont, California) and FlowJo  
447 software (Treestar). Data were normalized using a standard bead concentration counted by the  
448 cytometer with each sample (ThermoFisher, #C36950). Spleens were crushed between two  
449 slides, filtered through a 70µm cell strainer, and washed with FACS buffer. Isolated splenocytes  
450 were incubated with 1X RBC Lysis Buffer as done for leukocytes isolated from the brain prior to  
451 blocking and staining.

452

### 453 **In vivo assessment of blood brain barrier permeability**

454 In vivo assessment of blood brain barrier permeability was carried out as described (54).  
455 Mice were injected intraperitoneally with 100µL of 100mg/mL fluorescein sodium salt (Sigma,  
456 #F6377) dissolved in sterile 1X PBS. After 45 minutes, blood was collected followed by cardiac  
457 perfusion. Tissues were dissected and homogenized in 1X PBS as described above. Serum and  
458 supernatant from homogenized tissues were incubated overnight at 4°C with 2% Trichloroacetic  
459 acid solution (Sigma, #T0699) at a 1:1 dilution. Precipitated protein was pelleted by 10 minutes  
460 of centrifugation at 2,823xg at 4°C. Supernatants were diluted with borate buffer, pH 11 (Sigma,  
461 #1094621000) to achieve a neutral pH. Fluorescein emission at 538nm was measured for  
462 samples in an optically clear black-walled 96-well plate (Corning, #3904) using a SpectraMax  
463 iD3 plate reader (Molecular Devices, San Jose, CA). Tissue fluorescence values were  
464 standardized against plasma values for individual mice.

465

### 466 **Statistical analysis**

467 Normally distributed data were analyzed using appropriate parametric tests: two-way  
468 analysis of variance (ANOVA) with Sidak's correction for multiple comparisons and Log-rank  
469 (Mantel-Cox) test for survival comparison, both using GraphPad Prism Software v8 (GraphPad  
470 Software, San Diego, CA). Chi square tests for comparison of clinical disease signs was  
471 performed using Excel v2211 (Microsoft).  $P < 0.05$  was considered statistically significant.

472

473 **Acknowledgements**

474

475

476

477

478

This work was supported by R01 NS120895 (to BPD). JPA and IE were supported by NIH Supplement to Promote Diversity (R01 NS120895-S1 and NS120895-S2). NPC was supported by F31 NS124242.

479 Figures

480

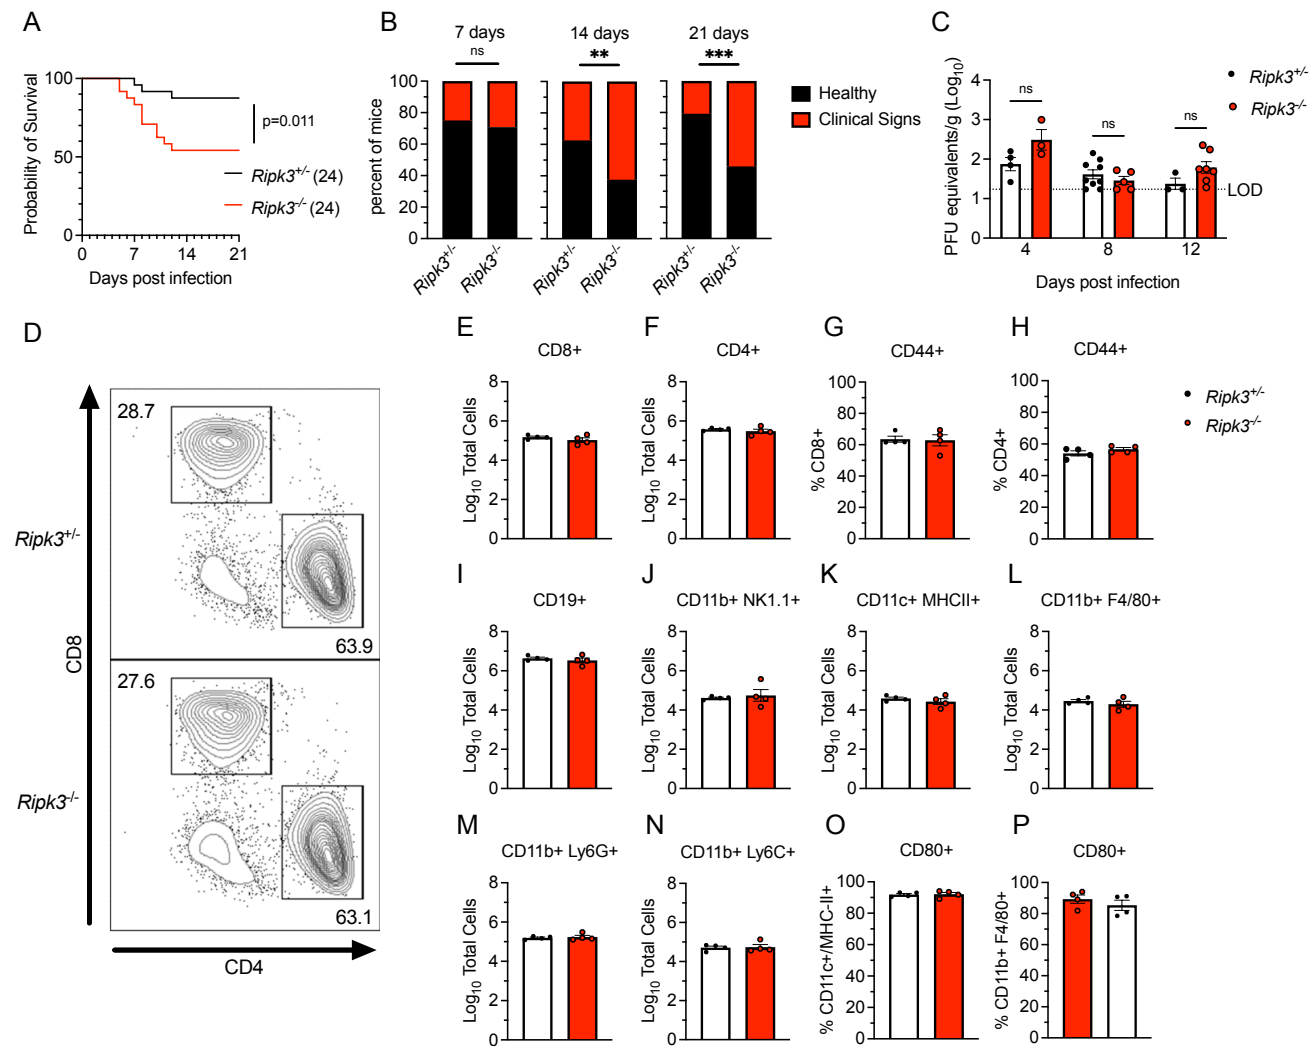

481

482

483

484

485

486

487

488

489

490

491

492

493

494

495

496

497

498

499

**Figure 1. RIPK3 limits LGTV pathogenesis independently of peripheral immunity**

(A-B) Survival analysis (A) and presentation of clinical signs of disease (B) in *Ripk3*<sup>-/-</sup> mice and littermate controls following subcutaneous inoculation with 3x10<sup>4</sup> PFU LGTV TP21. Data are pooled from two experiments. (C) *Ripk3*<sup>-/-</sup> and littermate control mice were infected subcutaneously with LGTV TP21. On indicated days following infection, splenic viral burden was measured via qRT-PCR. Data was normalized against a standard curve of known viral titers to generate plaque-forming unit (PFU) equivalents. Data for each day post infection are pooled from 2-3 experiments. LOD, limit of detection. (D-P) *Ripk3*<sup>-/-</sup> and littermate control mice were infected subcutaneously with LGTV TP21 for 8 days prior to harvesting splenocytes and profiling leukocytes by flow cytometry. (D) Representative flow cytometry plots showing CD8<sup>+</sup> and CD4<sup>+</sup> T cells among CD3<sup>+</sup> leukocytes in the spleen. Numbers represent percentage of cells in each gate relative to total plotted cells. (E-F) Numbers of CD8<sup>+</sup> T cells (E) and CD4<sup>+</sup> T cells (F) among CD3<sup>+</sup> leukocytes. (G-H) Percentage of CD44<sup>+</sup> cells among CD8<sup>+</sup> T cells (G) and CD4<sup>+</sup> T cells (H). (I-N) Numbers of CD19<sup>+</sup> B cells (I), CD11b<sup>+</sup> NK1.1<sup>+</sup> Natural Killer cells (J), CD11c<sup>+</sup> MHC-II<sup>+</sup> dendritic cells (K), CD45<sup>high</sup> CD11b<sup>+</sup> F4/80<sup>+</sup> macrophages (L), CD11b<sup>+</sup> Ly6G<sup>+</sup> neutrophils (M), and CD45<sup>high</sup> CD11b<sup>+</sup> Ly6C<sup>+</sup> monocytes (N) among total leukocytes in the spleen. (O-P) Percentage of CD80<sup>+</sup> cells among CD11c<sup>+</sup> MHC-II<sup>+</sup> dendritic cells (O) and CD11b<sup>+</sup> F4/80<sup>+</sup> macrophages (P). ns, not significant. \*\*p < 0.01, \*\*\*p < 0.001. Error bars represent SEM.

500

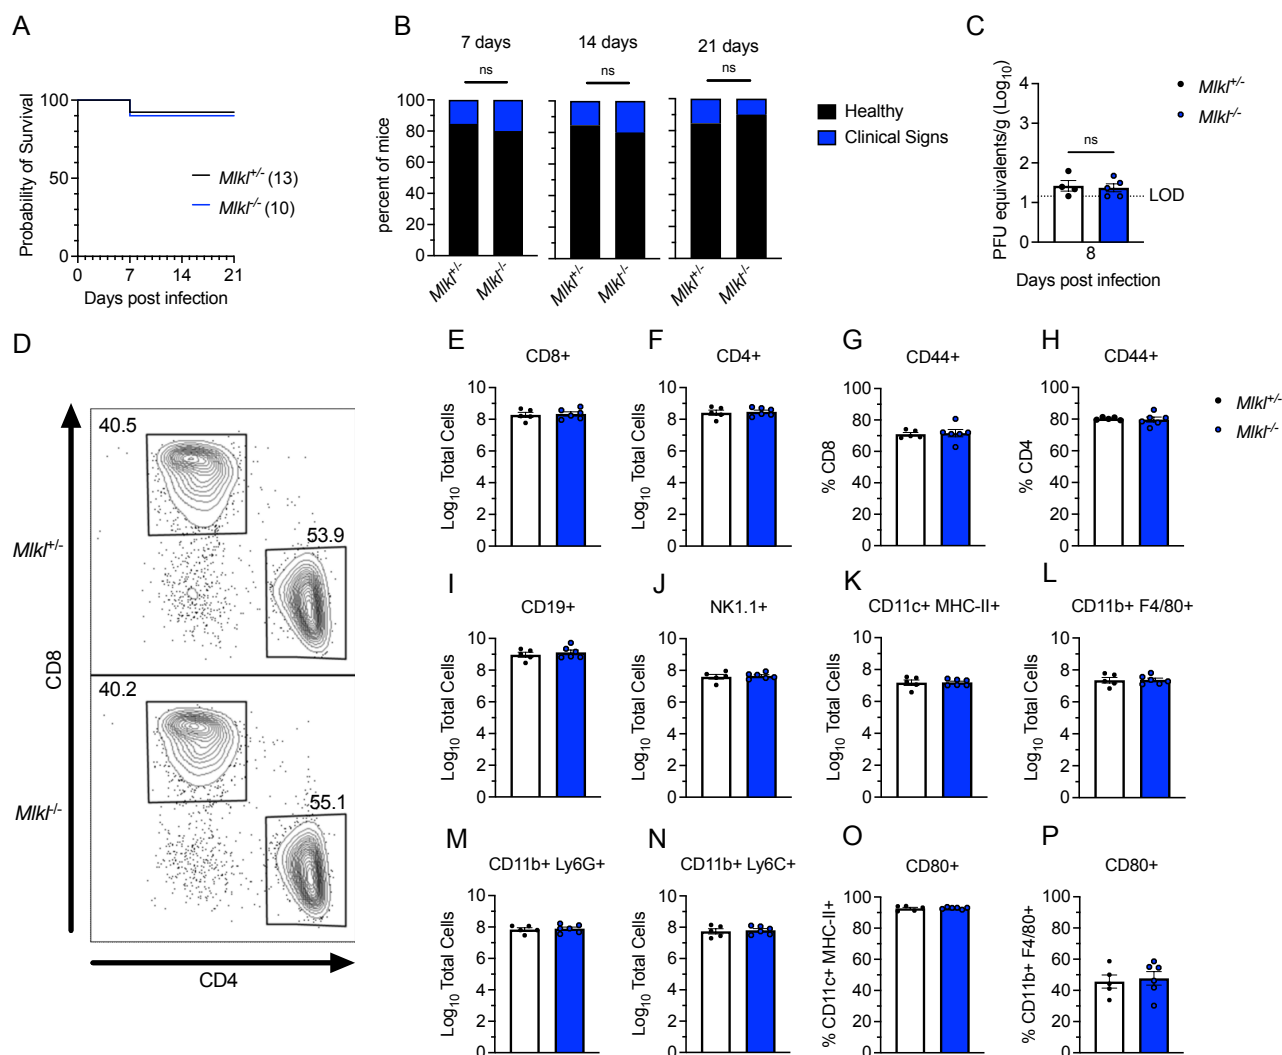

501  
502

**Figure 2. MLKL signaling does not influence Langkat virus pathogenesis.**

(A-B) Survival analysis (A) and presentation of clinical signs of disease (B) in *Mikl<sup>-/-</sup>* mice and littermate controls following subcutaneous inoculation with  $3 \times 10^4$  PFU LGTV TP21. Data are pooled from two experiments. (C) *Mikl<sup>-/-</sup>* and littermate control mice were infected subcutaneously with LGTV TP21. On indicated days following infection, splenic viral burden was measured via qRT-PCR. Data was normalized against a standard curve of known viral titers to generate plaque-forming unit (PFU) equivalents. Data for each day post infection are pooled from 2-3 experiments. LOD, limit of detection. (D-P) *Mikl<sup>-/-</sup>* and littermate control mice were infected subcutaneously with LGTV TP21 for 8 days prior to harvesting splenocytes and profiling leukocytes by flow cytometry. (D) Representative flow cytometry plots showing CD8+ and CD4+ T cells among CD3+ leukocytes in the spleen. Numbers represent percentage of cells in each gate relative to total plotted cells. (E-F) Numbers of CD8+ T cells (E) and CD4+ T cells (F) among CD3+ leukocytes. (G-H) Percentage of CD44+ cells among CD8+ T cells (G) and CD4+ T cells (H). (I-N) Numbers of CD19+ B cells (I), CD11b+ NK1.1+ Natural Killer cells (J), CD11c+ MHC-II+ dendritic cells (K), CD45high CD11b+ F4/80+ macrophages (L), CD11b+ Ly6G+ neutrophils (M), and CD45high CD11b+ Ly6C+ monocytes (N) among total leukocytes in the spleen. (O-P) Percentage of CD80+ cells among CD11c+ MHC-II+ dendritic cells (O) and CD11b+ F4/80+ macrophages (P). ns, not significant. Error bars represent SEM.

519

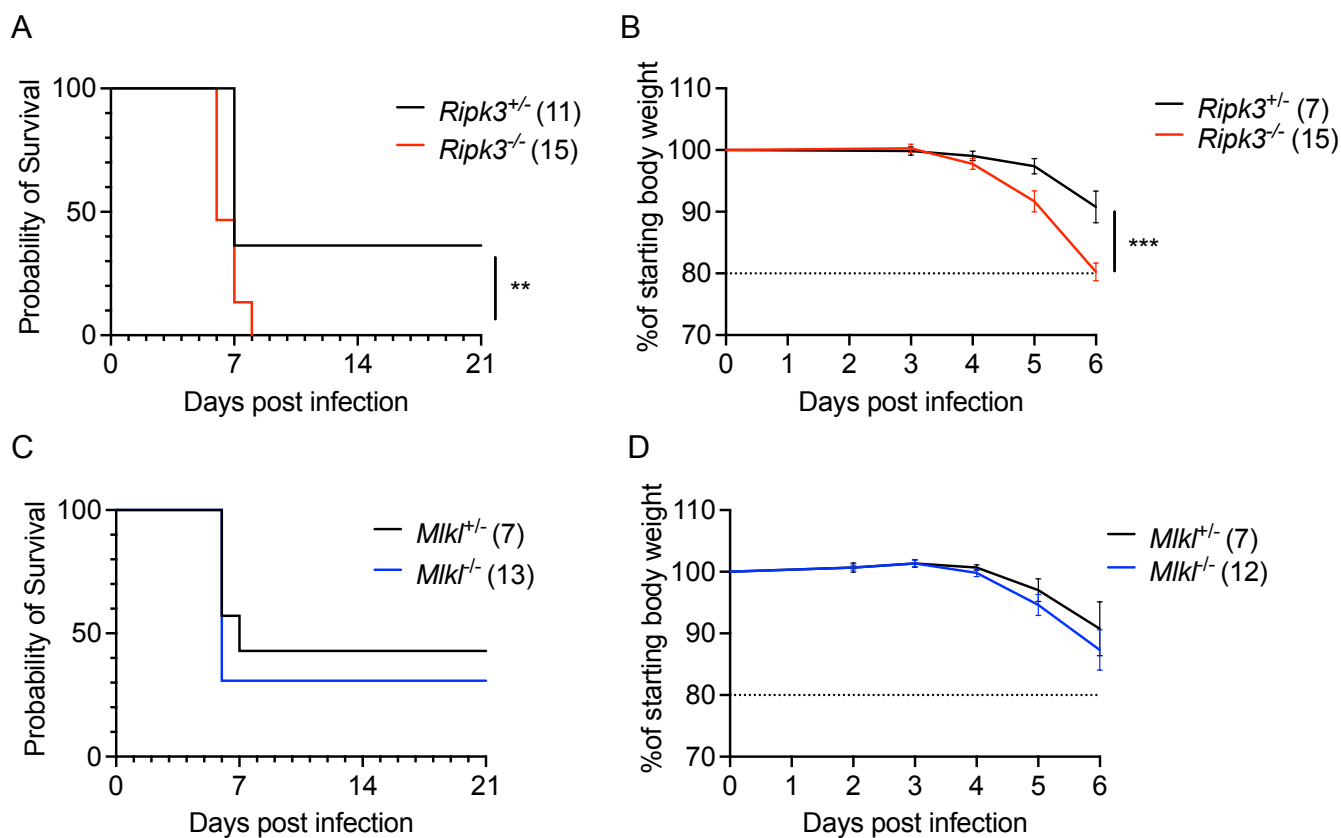

520

521

522

523

524

525

**Figure 3. RIPK3, but not MLKL, restricts Langkat virus pathogenesis following intracranial infection.**

Survival and body weight analysis from *Ripk3*<sup>-/-</sup> (A-B) and *Mlkl*<sup>-/-</sup> (C-D) mice and their respective littermate controls following intracranial inoculation with 50 PFU LGTV TP21. Data are pooled from two (A-B) or three (C-D) experiments. ns, not significant. \*\*p < 0.01, \*\*\*p < 0.001.

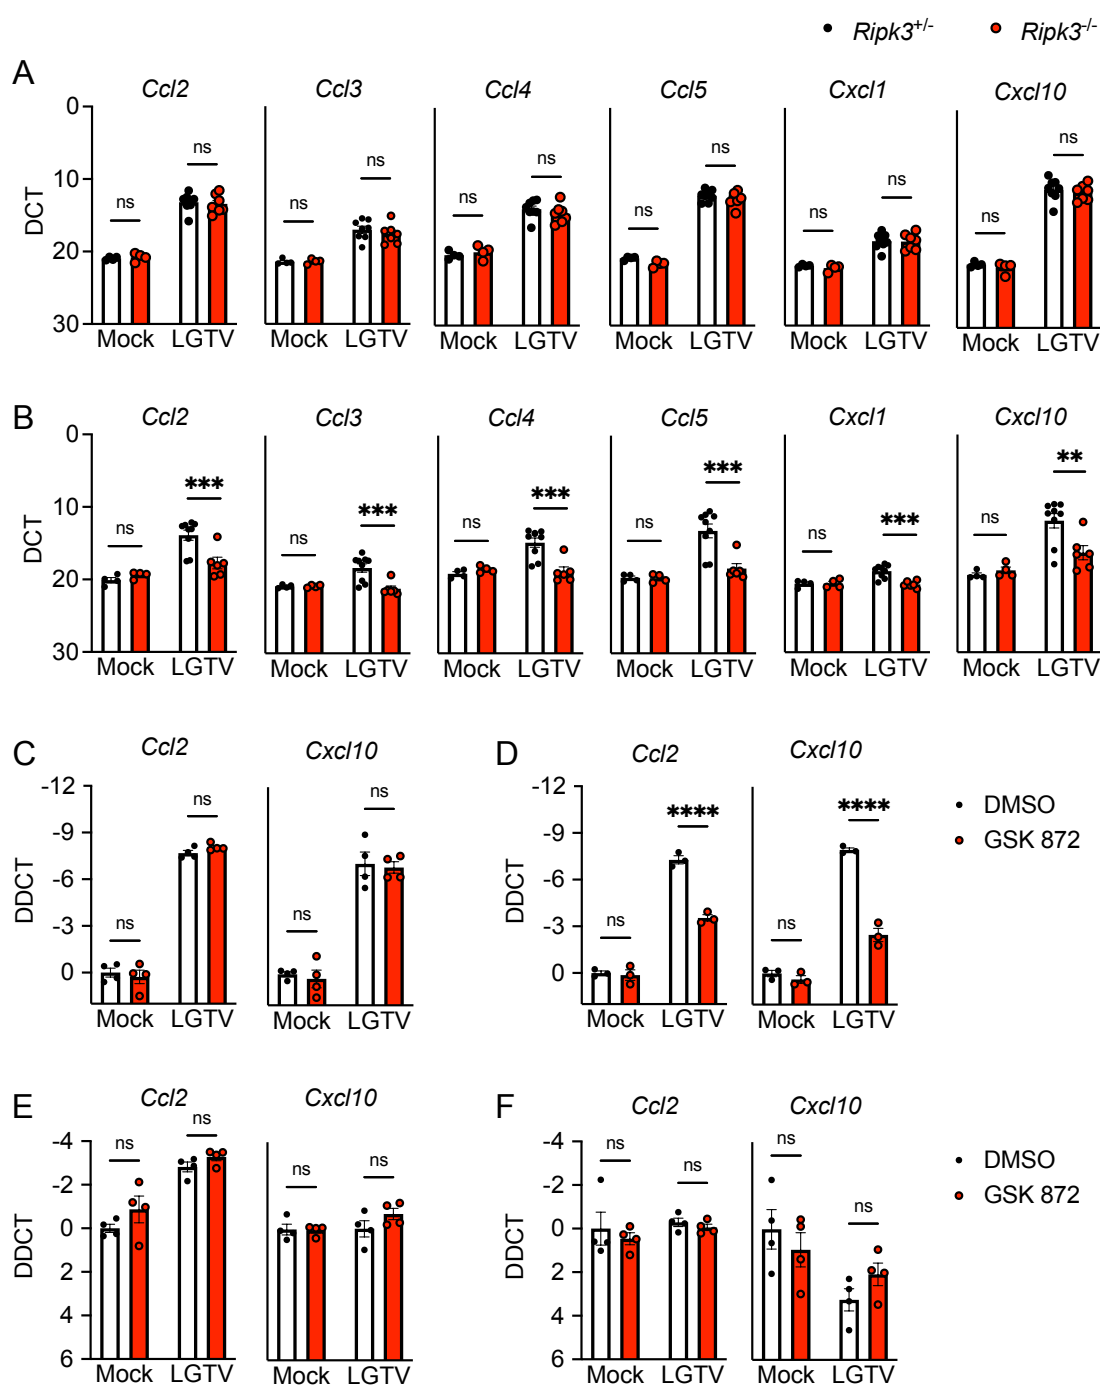

526  
527  
528  
529  
530  
531  
532  
533  
534  
535

**Figure 4. RIPK3 promotes chemokine expression in the cerebellum during LGTV encephalitis.**

(A-B) *Ripk3*<sup>-/-</sup> and littermate control mice were infected subcutaneously with LGTV TP21. At 8dpi cerebral cortical (A) and cerebellar tissues (B) were harvested and assayed for chemokine transcripts via qRT-PCR. (C-F) *Ccl2* and *Cxcl10* expression in wildtype (C57BL/6J) cultures of primary cortical neurons (C), cerebellar granule cell neurons (D), cortical astrocytes (E), and cerebellar astrocytes (F) following 2-hour pretreatment with GSK872 or vehicle and 24h infection with 0.5 (C-D) or 0.01 (E-F) MOI LGTV TP21, measured via qRT-PCR. ns, not significant. \* $p < 0.05$ , \*\* $p < 0.01$ , \*\*\* $p < 0.001$ , \*\*\*\* $p < 0.0001$ . Error bars represent SEM.



536

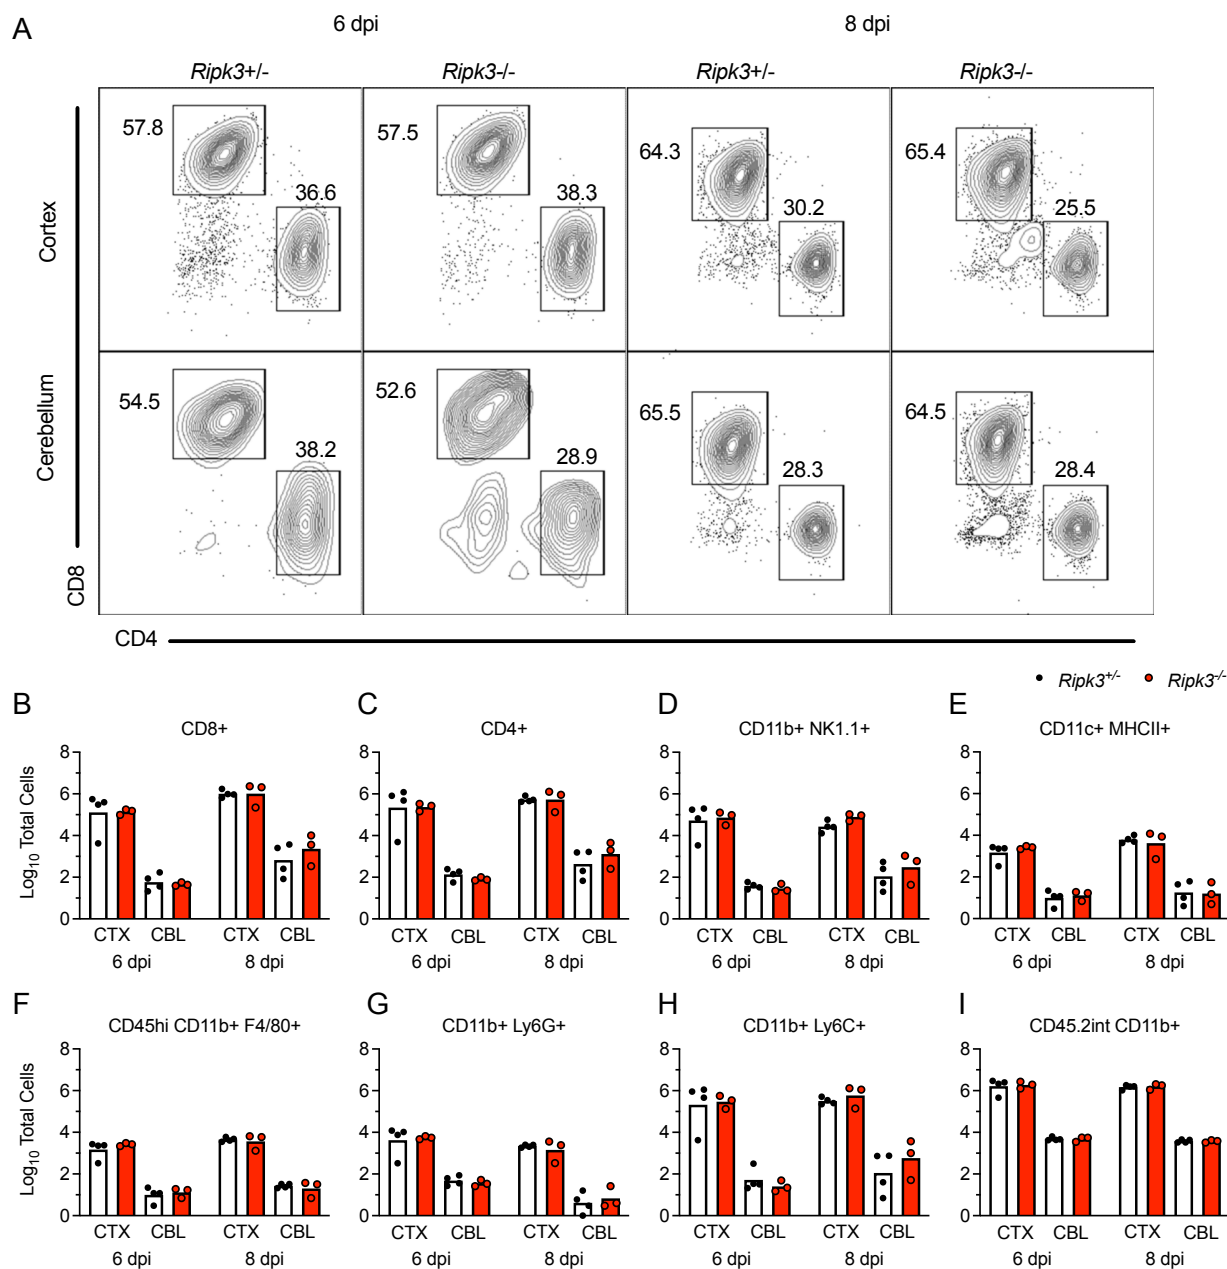

537

538

539

**Figure 5. Leukocyte recruitment to the CNS occurs independently of RIPK3 signaling during LGTV encephalitis.**

(A-I) *Ripk3*<sup>-/-</sup> and littermate control mice were infected subcutaneously with LGTV TP21. Cerebral cortical and cerebellar tissues were harvested and leukocytes isolated for flow cytometric profiling at indicated days post infection (dpi). (A) Representative flow cytometry plots showing CD8<sup>+</sup> and CD4<sup>+</sup> T cells among CD3<sup>+</sup> leukocytes in the brain. Numbers represent percentage of cells in each gate relative to total plotted cells. (B-I) Numbers of CD8<sup>+</sup> T cells (B), CD4<sup>+</sup> T cells (C), CD11b<sup>+</sup> NK1.1<sup>+</sup> natural killer cells (D), CD11c<sup>+</sup> MHC-II<sup>+</sup> dendritic cells (E), CD45<sup>high</sup> CD11b<sup>+</sup> F4/80<sup>+</sup> macrophages (F), CD11b<sup>+</sup> Ly6G<sup>+</sup> neutrophils (G), CD45<sup>high</sup> CD11b<sup>+</sup> Ly6C<sup>+</sup> monocytes (H), and CD45.2<sup>lo</sup> CD11b<sup>+</sup> microglia (I) among total brain leukocytes. No comparisons are statistically significant.

548

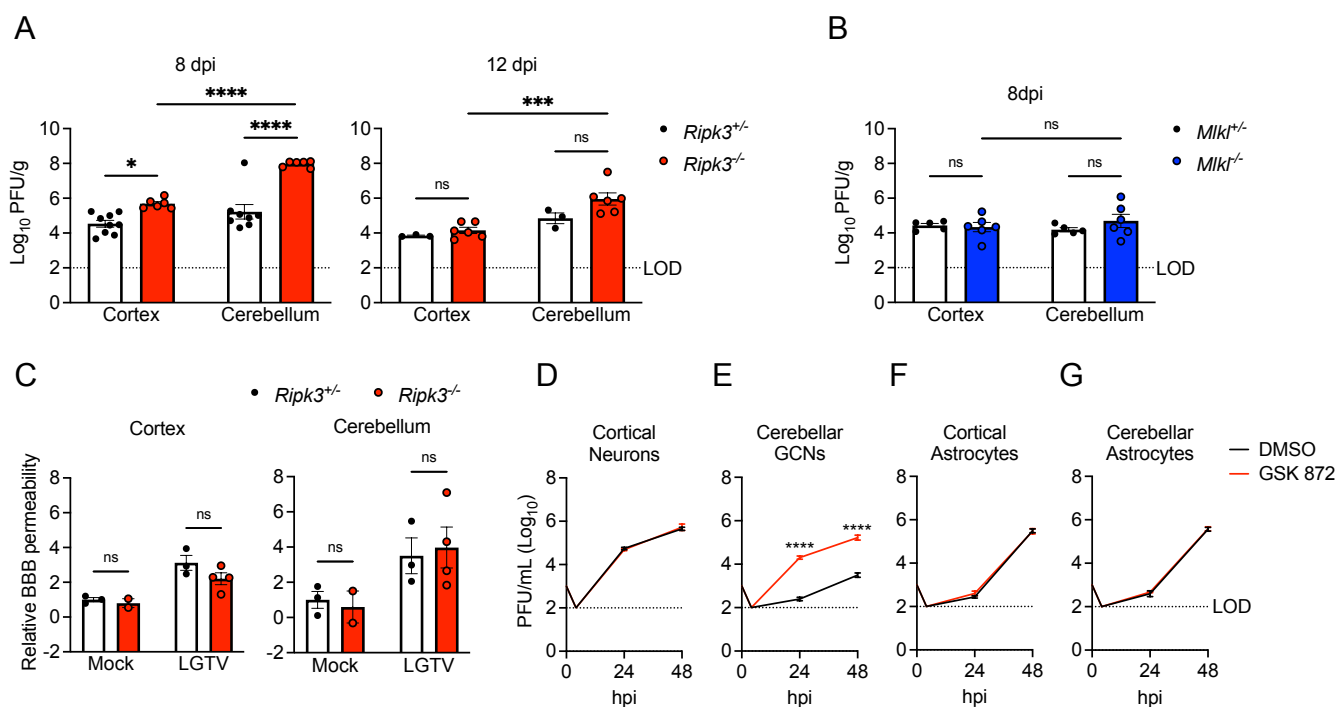

549  
550

551

**Figure 6. RIPK3 limits LGTV replication in cerebellar granule cell neurons.**

552

(A-B) *Ripk3*<sup>-/-</sup> (A) or *Mlkl*<sup>-/-</sup> (B) mice and littermate controls were infected subcutaneously with LGTV

553

TP21. At 8 or 12 days post infection (dpi), viral loads in cerebral cortical and cerebellar tissues were

554

determined by plaque assay. Data are pooled from 2-3 independent experiments. (C) *Ripk3*<sup>-/-</sup> and

555

littermate control mice were subcutaneously infected with LGTV TP21. BBB permeability was measured

556

at 8 dpi by detection of sodium fluorescein accumulation in tissue homogenates derived from cerebral

557

cortex or cerebellum. Data represent individual brain fluorescence values normalized to serum sodium

558

fluorescein concentration. Individual mouse values were then normalized to the mean values for

559

uninfected controls. (D-G) Multistep growth curve analysis following infection with 0.01 MOI LGTV TP21

560

in cortical neurons (D), cerebellar granule cell neurons (E), cortical astrocytes (F), and cerebellar

561

astrocytes (G). n=3 (cerebellar granule cell neurons) or 4 (astrocytes and cortical neurons) for growth

562

curve experiments. ns, not significant. \*p<0.05, \*\*p < 0.01, \*\*\*p < 0.001, \*\*\*\*p < 0.0001. Error bars

563

represent SEM.

564

565

566

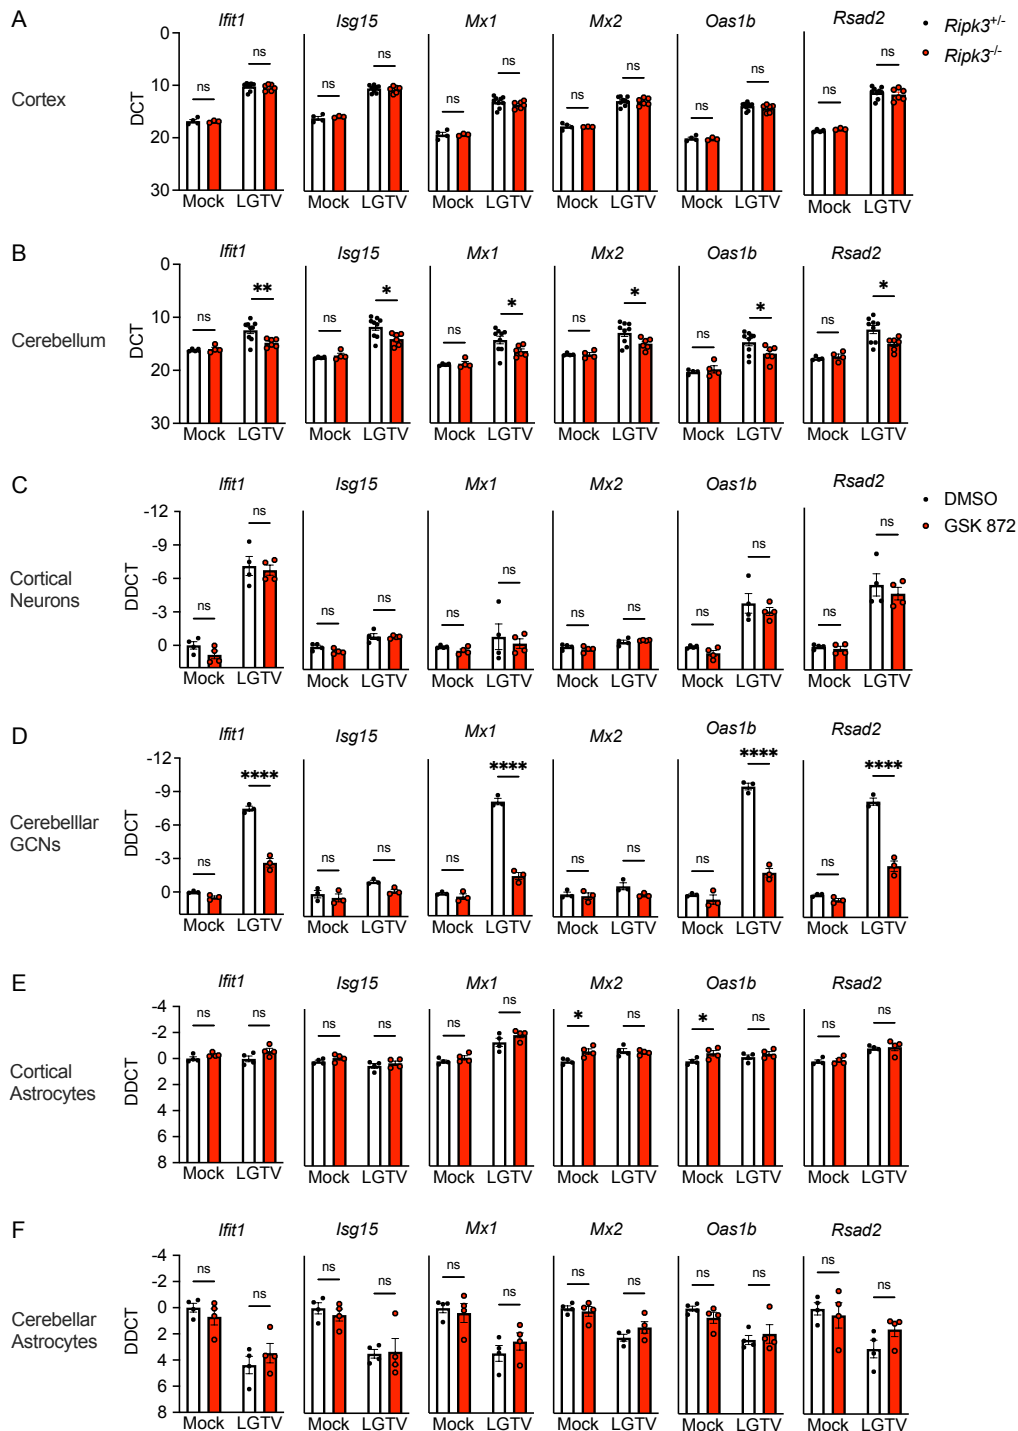

567

568 **Figure 7. RIPK3 promotes ISG expression in cerebellar granule cell neurons.**

569 (A-B) *Ripk3*<sup>-/-</sup> and littermate control mice were infected subcutaneously with LGTV TP21. Transcriptional  
 570 expression of indicated genes was assessed via qRT-PCR in cerebral cortical (A) and cerebellar (B) tissues  
 571 at 8dpi. (C-D) Transcriptional expression of ISGs in wildtype (C57BL/6J) cultures of primary cortical  
 572 neurons (C), cerebellar granule cell neurons (D), cortical astrocytes (E), and cerebellar astrocytes (F)  
 573 following 2-hour pretreatment with GSK872 or vehicle and 24-hour infection with 0.5 (C-D) or 0.01 (E-F)  
 574 MOI LGTV TP21, measured via qRT-PCR. ns, not significant. \**p*<0.05, \*\**p*< 0.01, \*\*\**p*< 0.001, \*\*\*\**p*<  
 575 0.0001. Error bars represent SEM.

576

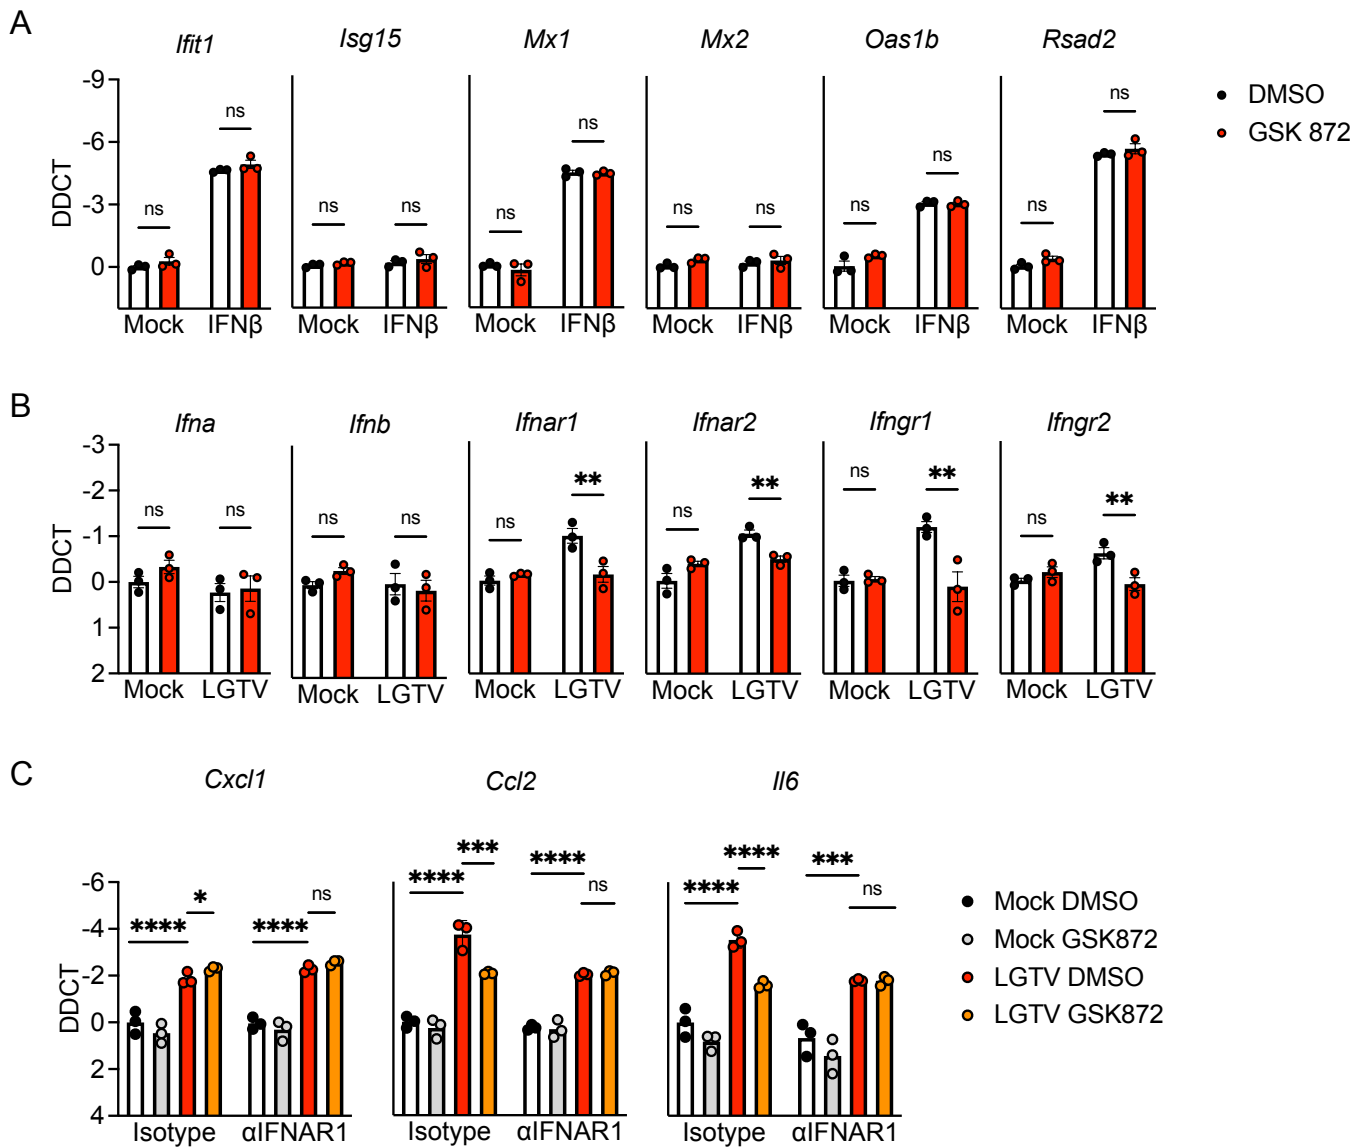

577  
578  
579  
580  
581  
582  
583  
584  
585  
586  
587  
588  
589

**Figure 8. RIPK3 promotes expression of IFN receptors and IFN-dependent inflammatory genes in cerebellar granule cell neurons.**

A-B) Transcriptional expression of indicated genes in wildtype (C57BL/6J) cultures of cerebellar granule cell neurons in the setting of 2-hour pretreatment with GSK872 or vehicle followed by 1 hour treatment with 10ng/ml IFN $\beta$  (A) or 24-hour infection with 0.5 MOI LGTV TP21 (B). C) Expression of indicated genes in wildtype cerebellar granule cell neurons pretreated for 45 minutes with an anti-IFNAR1 neutralizing antibody or isotype control +/- cotreatment with GSK872 or vehicle, followed by 24-hour infection with 0.5 MOI LGTV TP21. ns, not significant. \* $p < 0.05$ , \*\* $p < 0.01$ , \*\*\* $p < 0.001$ , \*\*\*\* $p < 0.0001$ . Error bars represent SEM.

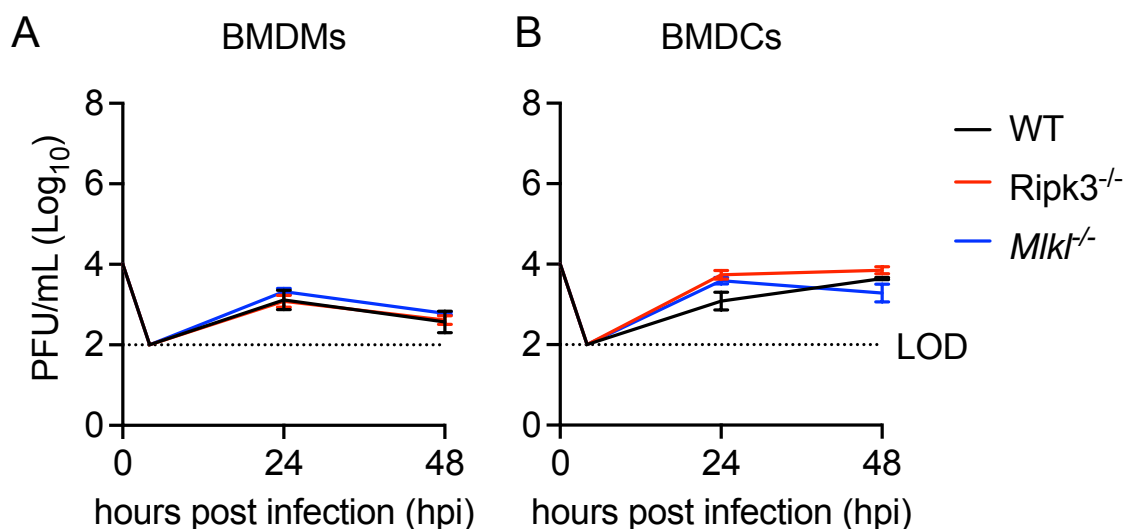

590  
591

592 **Supplemental Figure 1: Neither RIPK3 nor MLKL is required for restriction of LGTV replication in bone**  
593 **marrow-derived macrophages and dendritic cells**

594 (A-B) Multistep growth curve analysis following infection with 0.01 MOI LGTV TP21 in primary  
595 macrophages (BMDMs) (A) and dendritic cells (BMDCs) (B) cultured from bone marrow of C57BL/6J  
596 (WT), *Ripk3*<sup>-/-</sup>, or *Mlkl*<sup>-/-</sup> mice. (n=4) No comparisons are statistically significant.  
597

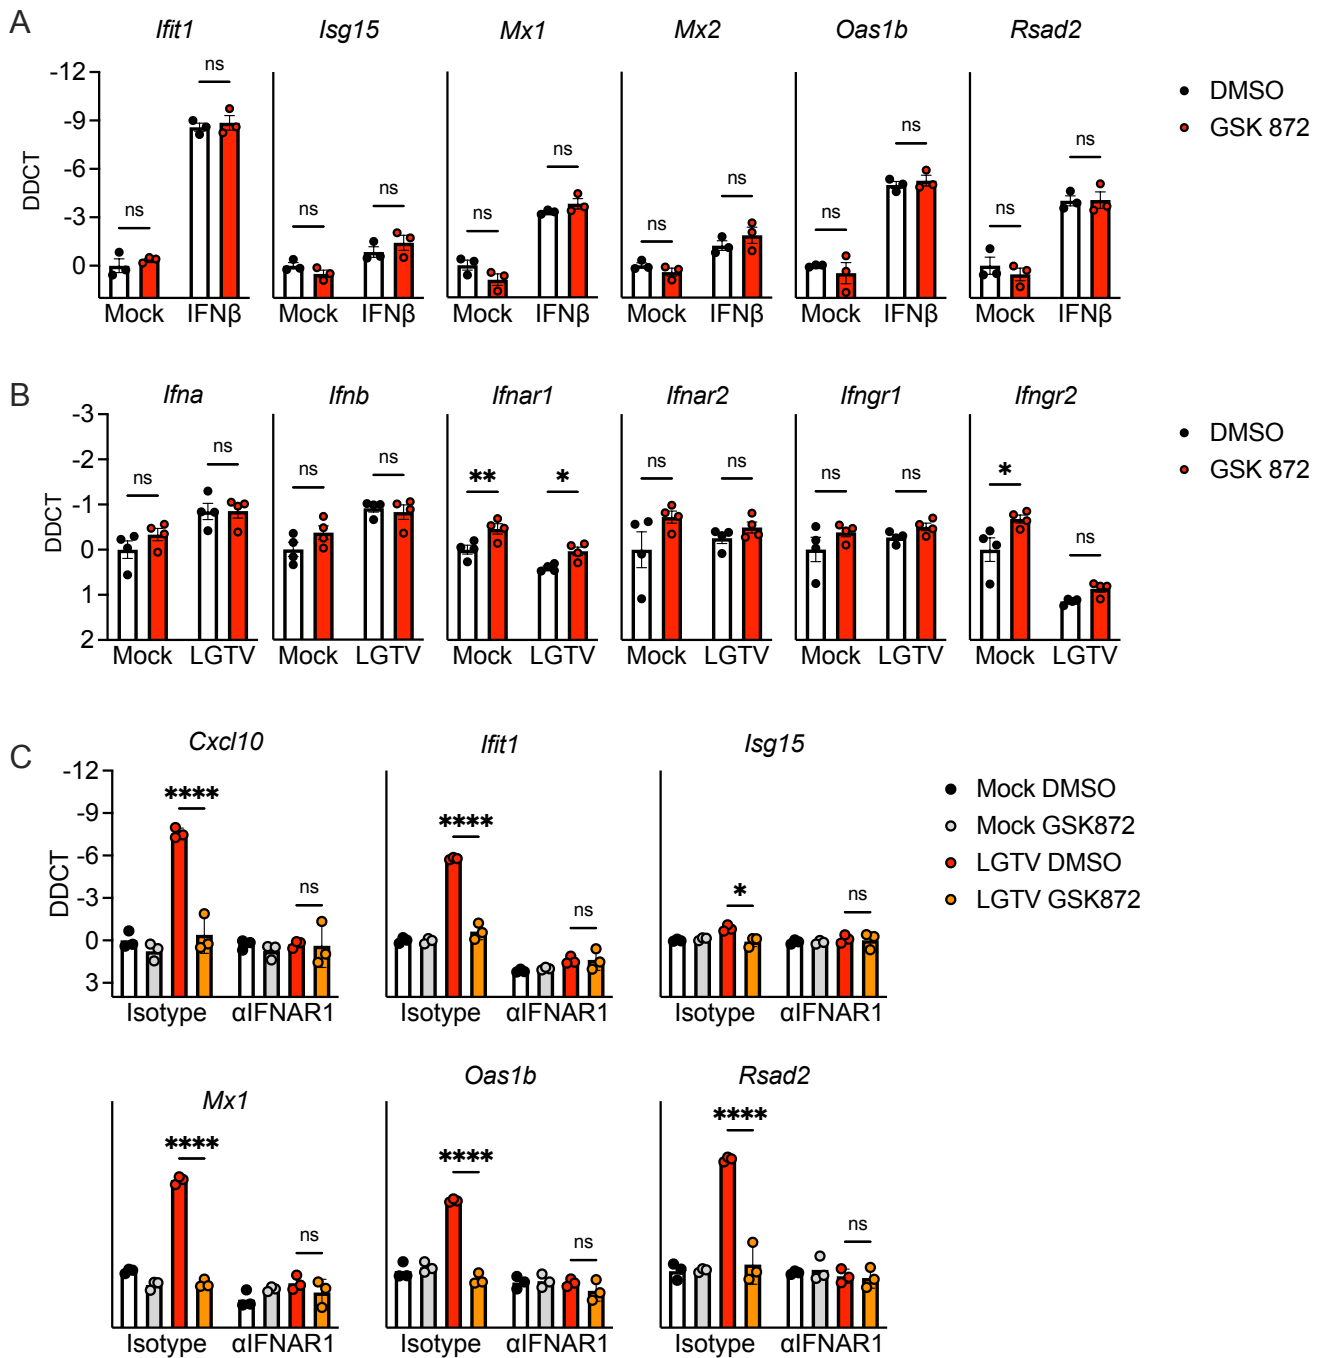

598

599

**Supplemental Figure 2. RIPK3 does not impact IFN-mediated responses to LGTV in cortical neurons.**

600

A-B) Transcriptional expression of indicated genes in wildtype (C57BL/6J) cultures of cerebral cortical neurons in the setting of 2-hour pretreatment with GSK872 or vehicle followed by 1 hour treatment with 10ng/ml IFN $\beta$  (A) or 24-hour infection with 0.5 MOI LGTV TP21 (B). C) Expression of indicated genes in wildtype cerebral cortical neurons pretreated for 45 minutes with an anti-IFNAR1 neutralizing antibody or isotype control +/- cotreatment with GSK872 or vehicle, followed by 24-hour infection with 0.5 MOI LGTV TP21. ns, not significant. \*p<0.05, \*\*p < 0.01, \*\*\*p < 0.001, \*\*\*\*p < 0.0001. Error bars represent SEM.

606

607

608

**Supplemental Table 1: Primer sequences for qRT-PCR**

| Gene          | Direction | Sequence (5'-3')           |
|---------------|-----------|----------------------------|
| <i>18S</i>    | Forward   | CTTAGAGGGACAAGTGGCG        |
| <i>18S</i>    | Reverse   | ACGCTGAGCCAGTCAGTGTA       |
| <i>Ccl2</i>   | Forward   | TGG CTC AGC CAG ATG CAG T  |
| <i>Ccl2</i>   | Reverse   | TTG GGA TCA TCT TGC TGG TG |
| <i>Ccl3</i>   | Forward   | CCA AGT CTT CTC AGC GCC AT |
| <i>Ccl3</i>   | Reverse   | TCC GGC TGT AGG AGA AGC AG |
| <i>Ccl4</i>   | Forward   | TCT TGC TCG TGG CTG CCT    |
| <i>Ccl4</i>   | Reverse   | GGG AGG GTC AGA GCC CA     |
| <i>Ccl5</i>   | Forward   | CCTGCTGCTTTGCCTACCTCTC     |
| <i>Ccl5</i>   | Reverse   | ACACACTTGGCGGTTCTTCGA      |
| <i>Cxcl1</i>  | Forward   | ATCCAGAGCTTGAAGGTGTTG      |
| <i>Cxcl1</i>  | Reverse   | GTCTGTCTTCTTCTCCGTTACTT    |
| <i>Cxcl10</i> | Forward   | CCCACGTGTTGAGATCATTG       |
| <i>Cxcl10</i> | Reverse   | CACTGGGTAAAGGGGAGTGA       |
| <i>Ifit1</i>  | Forward   | CCCAGAGAACAGCTACCACC       |
| <i>Ifit1</i>  | Reverse   | TGTGAAGTGACATCTCAGCTGA     |
| <i>Ifna</i>   | Forward   | CTTCCACAGGATCACTGTGTACCT   |
| <i>Ifna</i>   | Reverse   | TTCTGCTCTGACCACCTCCC       |
| <i>Ifnar1</i> | Forward   | TGTGCTTCCCACCACTCAAG       |
| <i>Ifnar1</i> | Reverse   | AGGCGCGTGCTTTACTTCTA       |
| <i>Ifnar2</i> | Forward   | AGACTCTTCGGGTCGCGG         |
| <i>Ifnar2</i> | Reverse   | GTTTTTCTGCTCTCACACCTGA     |
| <i>Ifnb</i>   | Forward   | CTGGAGCAGCTGAATGGAAAG      |
| <i>Ifnb</i>   | Reverse   | CTTCTCCGTCATCTCCATAGGG     |
| <i>Ifng</i>   | Forward   | CCTCATGGCTGTTTCTGGCT       |
| <i>Ifng</i>   | Reverse   | TCATGTCACCATCCTTTTGCC      |
| <i>Ifngr1</i> | Forward   | GTGGAGCTTTGACGAGCACT       |
| <i>Ifngr1</i> | Reverse   | TCAGTCCAGGAACCCGAATA       |
| <i>Ifngr2</i> | Forward   | CGTCCTCGCCAGACTCGTT        |
| <i>Ifngr2</i> | Reverse   | AGCAACCTATGCCAAGAGCC       |
| <i>Il6</i>    | Forward   | ACACATGTTCTCTGGGAAATCGT    |
| <i>Il6</i>    | Reverse   | AAGTGCATCATCGTTGTTTCATACA  |
| <i>Isg15</i>  | Forward   | TGCCTGCAGTTCTGTACCAC       |
| <i>Isg15</i>  | Reverse   | AGTGCTCCAGGACGGTCTTA       |
| <i>Mx1</i>    | Forward   | ACTATGAGGAGAAGGTGCGG       |
| <i>Mx1</i>    | Reverse   | ACTTTGCCTCTCCACTCCTC       |
| <i>Mx2</i>    | Forward   | GCCACGTTCCCTTGATCATC       |
| <i>Mx2</i>    | Reverse   | AGCCAGCTTAACCAGGGAAT       |
| <i>Oas1b</i>  | Forward   | TTCTACGCCAATCTCATCAGTG     |
| <i>Oas1b</i>  | Reverse   | GGTCCCCAGCTTCTCCTTAC       |
| <i>Rsad2</i>  | Forward   | TCAAAAGCTGAGGAGGTGGTG      |
| <i>Rsad2</i>  | Reverse   | TAGGAGGCACTGGAAAACCTTC     |

## 610 References

611

- 612 1. Schultz JS, Sparks H, Beckham JD. 2021. Arboviral central nervous system infections.  
613 *Curr Opin Infect Dis* 34:264-271.
- 614 2. Ruzek D, Avsic Zupanc T, Borde J, Chrdle A, Eyer L, Karganova G, Kholodilov I, Knap N,  
615 Kozlovskaya L, Matveev A, Miller AD, Osolodkin DI, Overby AK, Tikunova N, Tkachev S,  
616 Zajkowska J. 2019. Tick-borne encephalitis in Europe and Russia: Review of  
617 pathogenesis, clinical features, therapy, and vaccines. *Antiviral Res* 164:23-51.
- 618 3. Riccardi N, Antonello RM, Luzzati R, Zajkowska J, Di Bella S, Giacobbe DR. 2019. Tick-  
619 borne encephalitis in Europe: a brief update on epidemiology, diagnosis, prevention, and  
620 treatment. *Eur J Intern Med* 62:1-6.
- 621 4. Abdiyeva K, Turebekov N, Yegemberdiyeva R, Dmitrovskiy A, Yeraliyeva L, Shapiyeva Z,  
622 Nurmakhanov T, Sansyzbayev Y, Froeschl G, Hoelscher M, Zinner J, Essbauer S, Frey  
623 S. 2020. Vectors, molecular epidemiology and phylogeny of TBEV in Kazakhstan and  
624 central Asia. *Parasit Vectors* 13:504.
- 625 5. Beaute J, Spiteri G, Warns-Petit E, Zeller H. 2018. Tick-borne encephalitis in Europe,  
626 2012 to 2016. *Euro Surveill* 23.
- 627 6. Fares M, Cochet-Bernoin M, Gonzalez G, Montero-Menei CN, Blanchet O, Benchoua A,  
628 Boissart C, Lecollinet S, Richardson J, Haddad N, Couplier M. 2020. Pathological  
629 modeling of TBEV infection reveals differential innate immune responses in human  
630 neurons and astrocytes that correlate with their susceptibility to infection. *J*  
631 *Neuroinflammation* 17:76.
- 632 7. Szretter KJ, Daffis S, Patel J, Suthar MS, Klein RS, Gale M, Jr., Diamond MS. 2010. The  
633 innate immune adaptor molecule MyD88 restricts West Nile virus replication and spread  
634 in neurons of the central nervous system. *J Virol* 84:12125-38.
- 635 8. Iwasaki Y, Zhao JX, Yamamoto T, Konno H. 1986. Immunohistochemical demonstration  
636 of viral antigens in Japanese encephalitis. *Acta Neuropathol* 70:79-81.
- 637 9. Klein RS, Lin E, Zhang B, Luster AD, Tollett J, Samuel MA, Engle M, Diamond MS. 2005.  
638 Neuronal CXCL10 directs CD8+ T-cell recruitment and control of West Nile virus  
639 encephalitis. *J Virol* 79:11457-66.
- 640 10. Lindqvist R, Upadhyay A, Overby AK. 2018. Tick-Borne Flaviviruses and the Type I  
641 Interferon Response. *Viruses* 10.
- 642 11. Samuel MA, Diamond MS. 2005. Alpha/beta interferon protects against lethal West Nile  
643 virus infection by restricting cellular tropism and enhancing neuronal survival. *J Virol*  
644 79:13350-61.
- 645 12. Cho H, Proll SC, Szretter KJ, Katze MG, Gale M, Jr., Diamond MS. 2013. Differential  
646 innate immune response programs in neuronal subtypes determine susceptibility to  
647 infection in the brain by positive-stranded RNA viruses. *Nat Med* 19:458-64.
- 648 13. Daniels BP, Jujjavarapu H, Durrant DM, Williams JL, Green RR, White JP, Lazear HM,  
649 Gale M, Jr., Diamond MS, Klein RS. 2017. Regional astrocyte IFN signaling restricts  
650 pathogenesis during neurotropic viral infection. *J Clin Invest* 127:843-856.
- 651 14. Morgan MJ, Kim YS. 2022. Roles of RIPK3 in necroptosis, cell signaling, and disease.  
652 *Exp Mol Med* 54:1695-1704.
- 653 15. Samson AL, Zhang Y, Geoghegan ND, Gavin XJ, Davies KA, Mlodzianoski MJ,  
654 Whitehead LW, Frank D, Garnish SE, Fitzgibbon C, Hempel A, Young SN, Jacobsen AV,  
655 Cawthorne W, Petrie EJ, Faux MC, Shield-Artin K, Lalaoui N, Hildebrand JM, Silke J,  
656 Rogers KL, Lessene G, Hawkins ED, Murphy JM. 2020. MLKL trafficking and  
657 accumulation at the plasma membrane control the kinetics and threshold for necroptosis.  
658 *Nat Commun* 11:3151.



- 659 16. Daniels BP, Snyder AG, Olsen TM, Orozco S, Oguin TH, 3rd, Tait SWG, Martinez J, Gale  
660 M, Jr., Loo YM, Oberst A. 2017. RIPK3 Restricts Viral Pathogenesis via Cell Death-  
661 Independent Neuroinflammation. *Cell* 169:301-313 e11.
- 662 17. Daniels BP, Kofman SB, Smith JR, Norris GT, Snyder AG, Kolb JP, Gao X, Locasale JW,  
663 Martinez J, Gale M, Jr., Loo YM, Oberst A. 2019. The Nucleotide Sensor ZBP1 and  
664 Kinase RIPK3 Induce the Enzyme IRG1 to Promote an Antiviral Metabolic State in  
665 Neurons. *Immunity* 50:64-76 e4.
- 666 18. Downey J, Pernet E, Coulombe F, Allard B, Meunier I, Jaworska J, Qureshi S, Vinh DC,  
667 Martin JG, Joubert P, Divangahi M. 2017. RIPK3 interacts with MAVS to regulate type I  
668 IFN-mediated immunity to Influenza A virus infection. *PLoS Pathog* 13:e1006326.
- 669 19. Saleh D, Najjar M, Zelic M, Shah S, Nogusa S, Polykratis A, Paczosa MK, Gough PJ,  
670 Bertin J, Whalen M, Fitzgerald KA, Slavov N, Pasparakis M, Balachandran S, Kelliher M,  
671 Meccas J, Degterev A. 2017. Kinase Activities of RIPK1 and RIPK3 Can Direct IFN-beta  
672 Synthesis Induced by Lipopolysaccharide. *J Immunol* 198:4435-4447.
- 673 20. Guo H, Koehler HS, Mocarski ES, Dix RD. 2022. RIPK3 and caspase 8 collaborate to  
674 limit herpes simplex encephalitis. *PLoS Pathog* 18:e1010857.
- 675 21. Peng R, Wang CK, Wang-Kan X, Idorn M, Kjaer M, Zhou FY, Fiil BK, Timmermann F,  
676 Orozco SL, McCarthy J, Leung CS, Lu X, Bagola K, Rehwinkel J, Oberst A, Maelfait J,  
677 Paludan SR, Gyrd-Hansen M. 2022. Human ZBP1 induces cell death-independent  
678 inflammatory signaling via RIPK3 and RIPK1. *EMBO Rep* 23:e55839.
- 679 22. Chou TW, Chang NP, Krishnagiri M, Patel AP, Lindman M, Angel JP, Kung PL, Atkins C,  
680 Daniels BP. 2021. Fibrillar alpha-synuclein induces neurotoxic astrocyte activation via  
681 RIP kinase signaling and NF-kappaB. *Cell Death Dis* 12:756.
- 682 23. Li S, Zhang Y, Guan Z, Ye M, Li H, You M, Zhou Z, Zhang C, Zhang F, Lu B, Zhou P,  
683 Peng K. 2023. SARS-CoV-2 Z-RNA activates the ZBP1-RIPK3 pathway to promote virus-  
684 induced inflammatory responses. *Cell Res* doi:10.1038/s41422-022-00775-y.
- 685 24. Najjar M, Saleh D, Zelic M, Nogusa S, Shah S, Tai A, Finger JN, Polykratis A, Gough PJ,  
686 Bertin J, Whalen M, Pasparakis M, Balachandran S, Kelliher M, Poltorak A, Degterev A.  
687 2016. RIPK1 and RIPK3 Kinases Promote Cell-Death-Independent Inflammation by Toll-  
688 like Receptor 4. *Immunity* 45:46-59.
- 689 25. Hubbard NW, Ames JM, Maurano M, Chu LH, Somfleth KY, Gokhale NS, Werner M,  
690 Snyder JM, Lichauco K, Savan R, Stetson DB, Oberst A. 2022. ADAR1 mutation causes  
691 ZBP1-dependent immunopathology. *Nature* 607:769-775.
- 692 26. Xie Y, Zhao Y, Shi L, Li W, Chen K, Li M, Chen X, Zhang H, Li T, Matsuzawa-Ishimoto Y,  
693 Yao X, Shao D, Ke Z, Li J, Chen Y, Zhang X, Cui J, Cui S, Leng Q, Cadwell K, Li X, Wei  
694 H, Zhang H, Li H, Xiao H. 2020. Gut epithelial TSC1/mTOR controls RIPK3-dependent  
695 necroptosis in intestinal inflammation and cancer. *J Clin Invest* 130:2111-2128.
- 696 27. Sai K, Parsons C, House JS, Kathariou S, Ninomiya-Tsuji J. 2019. Necroptosis mediators  
697 RIPK3 and MLKL suppress intracellular *Listeria* replication independently of host cell  
698 killing. *J Cell Biol* 218:1994-2005.
- 699 28. Baker DG, Woods TA, Butchi NB, Morgan TM, Taylor RT, Sunyakumthorn P, Mukherjee  
700 P, Lubick KJ, Best SM, Peterson KE. 2013. Toll-like receptor 7 suppresses virus  
701 replication in neurons but does not affect viral pathogenesis in a mouse model of Langat  
702 virus infection. *J Gen Virol* 94:336-347.
- 703 29. Michlmayr D, Bardina SV, Rodriguez CA, Pletnev AG, Lim JK. 2016. Dual Function of  
704 *Ccr5* during Langat Virus Encephalitis: Reduction in Neutrophil-Mediated Central  
705 Nervous System Inflammation and Increase in T Cell-Mediated Viral Clearance. *J*  
706 *Immunol* 196:4622-31.

- 707 30. Kimura T, Katoh H, Kayama H, Saiga H, Okuyama M, Okamoto T, Umemoto E, Matsuura  
708 Y, Yamamoto M, Takeda K. 2013. Ifit1 inhibits Japanese encephalitis virus replication  
709 through binding to 5' capped 2'-O unmethylated RNA. *J Virol* 87:9997-10003.
- 710 31. Szretter KJ, Daniels BP, Cho H, Gaaney MD, Yokoyama WM, Gale M, Jr., Virgin HW,  
711 Klein RS, Sen GC, Diamond MS. 2012. 2'-O methylation of the viral mRNA cap by West  
712 Nile virus evades ifit1-dependent and -independent mechanisms of host restriction in  
713 vivo. *PLoS Pathog* 8:e1002698.
- 714 32. Dai J, Pan W, Wang P. 2011. ISG15 facilitates cellular antiviral response to dengue and  
715 west nile virus infection in vitro. *Virol J* 8:468.
- 716 33. Singh PK, Singh S, Farr D, Kumar A. 2019. Interferon-stimulated gene 15 (ISG15)  
717 restricts Zika virus replication in primary human corneal epithelial cells. *Ocul Surf* 17:551-  
718 559.
- 719 34. Bigham AW, Buckingham KJ, Husain S, Emond MJ, Bofferding KM, Gildersleeve H,  
720 Rutherford A, Astakhova NM, Perelygin AA, Busch MP, Murray KO, Sejvar JJ, Green S,  
721 Kriesel J, Brinton MA, Bamshad M. 2011. Host genetic risk factors for West Nile virus  
722 infection and disease progression. *PLoS One* 6:e24745.
- 723 35. Vonderstein K, Nilsson E, Hubel P, Nygard Skalman L, Upadhyay A, Pasto J, Pichlmair  
724 A, Lundmark R, Overby AK. 2018. Viperin Targets Flavivirus Virulence by Inducing  
725 Assembly of Noninfectious Capsid Particles. *J Virol* 92.
- 726 36. Williams JL, Manivasagam S, Smith BC, Sim J, Vollmer LL, Daniels BP, Russell JH, Klein  
727 RS. 2020. Astrocyte-T cell crosstalk regulates region-specific neuroinflammation. *Glia*  
728 68:1361-1374.
- 729 37. Simmons SB, Liggitt D, Goverman JM. 2014. Cytokine-regulated neutrophil recruitment is  
730 required for brain but not spinal cord inflammation during experimental autoimmune  
731 encephalomyelitis. *J Immunol* 193:555-63.
- 732 38. Pierson ER, Goverman JM. 2017. GM-CSF is not essential for experimental autoimmune  
733 encephalomyelitis but promotes brain-targeted disease. *JCI Insight* 2:e92362.
- 734 39. Durrant DM, Daniels BP, Pasiaka T, Dorsey D, Klein RS. 2015. CCR5 limits cortical viral  
735 loads during West Nile virus infection of the central nervous system. *J Neuroinflammation*  
736 12:233.
- 737 40. McComb S, Cessford E, Alturki NA, Joseph J, Shutinoski B, Startek JB, Gamero AM,  
738 Mossman KL, Sad S. 2014. Type-I interferon signaling through ISGF3 complex is  
739 required for sustained Rip3 activation and necroptosis in macrophages. *Proc Natl Acad*  
740 *Sci U S A* 111:E3206-13.
- 741 41. Brault M, Olsen TM, Martinez J, Stetson DB, Oberst A. 2018. Intracellular Nucleic Acid  
742 Sensing Triggers Necroptosis through Synergistic Type I IFN and TNF Signaling. *J*  
743 *Immunol* 200:2748-2756.
- 744 42. Ingram JP, Thapa RJ, Fisher A, Tummers B, Zhang T, Yin C, Rodriguez DA, Guo H,  
745 Lane R, Williams R, Slifker MJ, Basagoudanavar SH, Rall GF, Dillon CP, Green DR,  
746 Kaiser WJ, Balachandran S. 2019. ZBP1/DAI Drives RIPK3-Mediated Cell Death Induced  
747 by IFNs in the Absence of RIPK1. *J Immunol* 203:1348-1355.
- 748 43. Lee SA, Chang LC, Jung W, Bowman JW, Kim D, Chen W, Foo SS, Choi YJ, Choi UY,  
749 Bowling A, Yoo JS, Jung JU. 2023. OASL phase condensation induces amyloid-like  
750 fibrillation of RIPK3 to promote virus-induced necroptosis. *Nat Cell Biol*  
751 doi:10.1038/s41556-022-01039-y.
- 752 44. Yatim N, Jusforgues-Saklani H, Orozco S, Schulz O, Barreira da Silva R, Reis e Sousa  
753 C, Green DR, Oberst A, Albert ML. 2015. RIPK1 and NF-kappaB signaling in dying cells  
754 determines cross-priming of CD8(+) T cells. *Science* 350:328-34.

- 755 45. Snyder AG, Hubbard NW, Messmer MN, Kofman SB, Hagan CE, Orozco SL, Chiang K,  
756 Daniels BP, Baker D, Oberst A. 2019. Intratumoral activation of the necroptotic pathway  
757 components RIPK1 and RIPK3 potentiates antitumor immunity. *Sci Immunol* 4.
- 758 46. Wegner KW, Saleh D, Degterev A. 2017. Complex Pathologic Roles of RIPK1 and  
759 RIPK3: Moving Beyond Necroptosis. *Trends Pharmacol Sci* 38:202-225.
- 760 47. Angel JP, Daniels BP. 2022. Paradoxical roles for programmed cell death signaling  
761 during viral infection of the central nervous system. *Curr Opin Neurobiol* 77:102629.
- 762 48. Daniels BP, Oberst A. 2020. Outcomes of RIP Kinase Signaling During Neuroinvasive  
763 Viral Infection. *Curr Top Microbiol Immunol* doi:10.1007/82\_2020\_204.
- 764 49. Bian P, Ye C, Zheng X, Luo C, Yang J, Li M, Wang Y, Yang J, Zhou Y, Zhang F, Lian J,  
765 Zhang Y, Jia Z, Lei Y. 2020. RIPK3 Promotes JEV Replication in Neurons via  
766 Downregulation of IFI44L. *Front Microbiol* 11:368.
- 767 50. Bian P, Zheng X, Wei L, Ye C, Fan H, Cai Y, Zhang Y, Zhang F, Jia Z, Lei Y. 2017. MLKL  
768 Mediated Necroptosis Accelerates JEV-Induced Neuroinflammation in Mice. *Front*  
769 *Microbiol* 8:303.
- 770 51. Newton K, Sun X, Dixit VM. 2004. Kinase RIP3 is dispensable for normal NF-kappa Bs,  
771 signaling by the B-cell and T-cell receptors, tumor necrosis factor receptor 1, and Toll-like  
772 receptors 2 and 4. *Mol Cell Biol* 24:1464-9.
- 773 52. Murphy JM, Czabotar PE, Hildebrand JM, Lucet IS, Zhang JG, Alvarez-Diaz S, Lewis R,  
774 Lalaoui N, Metcalf D, Webb AI, Young SN, Varghese LN, Tannahill GM, Hatchell EC,  
775 Majewski IJ, Okamoto T, Dobson RC, Hilton DJ, Babon JJ, Nicola NA, Strasser A, Silke  
776 J, Alexander WS. 2013. The pseudokinase MLKL mediates necroptosis via a molecular  
777 switch mechanism. *Immunity* 39:443-53.
- 778 53. Kung PL, Chou TW, Lindman M, Chang NP, Estevez I, Buckley BD, Atkins C, Daniels  
779 BP. 2022. Zika virus-induced TNF-alpha signaling dysregulates expression of neurologic  
780 genes associated with psychiatric disorders. *J Neuroinflammation* 19:100.
- 781 54. Daniels BP, Holman DW, Cruz-Orengo L, Jujjavarapu H, Durrant DM, Klein RS. 2014.  
782 Viral pathogen-associated molecular patterns regulate blood-brain barrier integrity via  
783 competing innate cytokine signals. *mBio* 5:e01476-14.
- 784
